# Supplementary material for: Galactose-derived phosphonate analogues as potential inhibitors of phosphatidylinositol biosynthesis in mycobacteria
Source: Royal Society of Chemistry journal article supplement (doi:10.1039/b616450a), 2007-01-01
Supplement: b616450a.pdf [file b616450a.pdf]

Supplementary information for:

## Galactose-derived phosphonate analogues of inositol-1-phosphate and phosphatidylinositol

Zoran Dinev,<sup>a,b</sup> Carlie T. Gannon,<sup>a,b</sup> Caroline Egan,<sup>a,b</sup> Jacinta A. Watt,<sup>a,b</sup> Malcolm J. McConville<sup>b,c</sup> and Spencer J. Williams<sup>\*a,b</sup>

### Contents:

- S2: <sup>1</sup>H NMR for (PhO)<sub>2</sub>PNMe<sub>2</sub>
- S3: <sup>1</sup>H NMR for (PhO)<sub>2</sub>P(OiPr)
- S4: <sup>13</sup>C NMR for (PhO)<sub>2</sub>P(OiPr)
- S5: <sup>1</sup>H NMR for **3**
- S6: <sup>13</sup>C NMR for **3**
- S7: <sup>1</sup>H NMR for **7**
- S8: <sup>13</sup>C NMR for **7**
- S9: <sup>31</sup>P NMR for **7**
- S10: <sup>1</sup>H NMR for **8**
- S11: <sup>13</sup>C NMR for **8**
- S12: <sup>31</sup>P NMR for **8**
- S13: <sup>1</sup>H NMR for **11**
- S14: <sup>13</sup>C NMR for **11**
- S15: <sup>31</sup>P NMR for **11**
- S16: <sup>1</sup>H NMR for **12**
- S17: <sup>13</sup>C NMR for **12**
- S18: <sup>31</sup>P NMR for **12**
- S19: <sup>1</sup>H NMR for **13**
- S20: <sup>13</sup>C NMR for **13**
- S21: <sup>1</sup>H NMR for **1**
- S22: <sup>31</sup>P NMR for **1**
- S23: <sup>31</sup>P NMR for **2**
- S24: HRMS data for **2**
- S25: HPTLC analysis of octyl  $\alpha$ -D-mannoside control experiment.

cont-14-14.DJ2 run on date 200 08/18/04

 $(\text{PhO})_2\text{PNiMe}_2$ 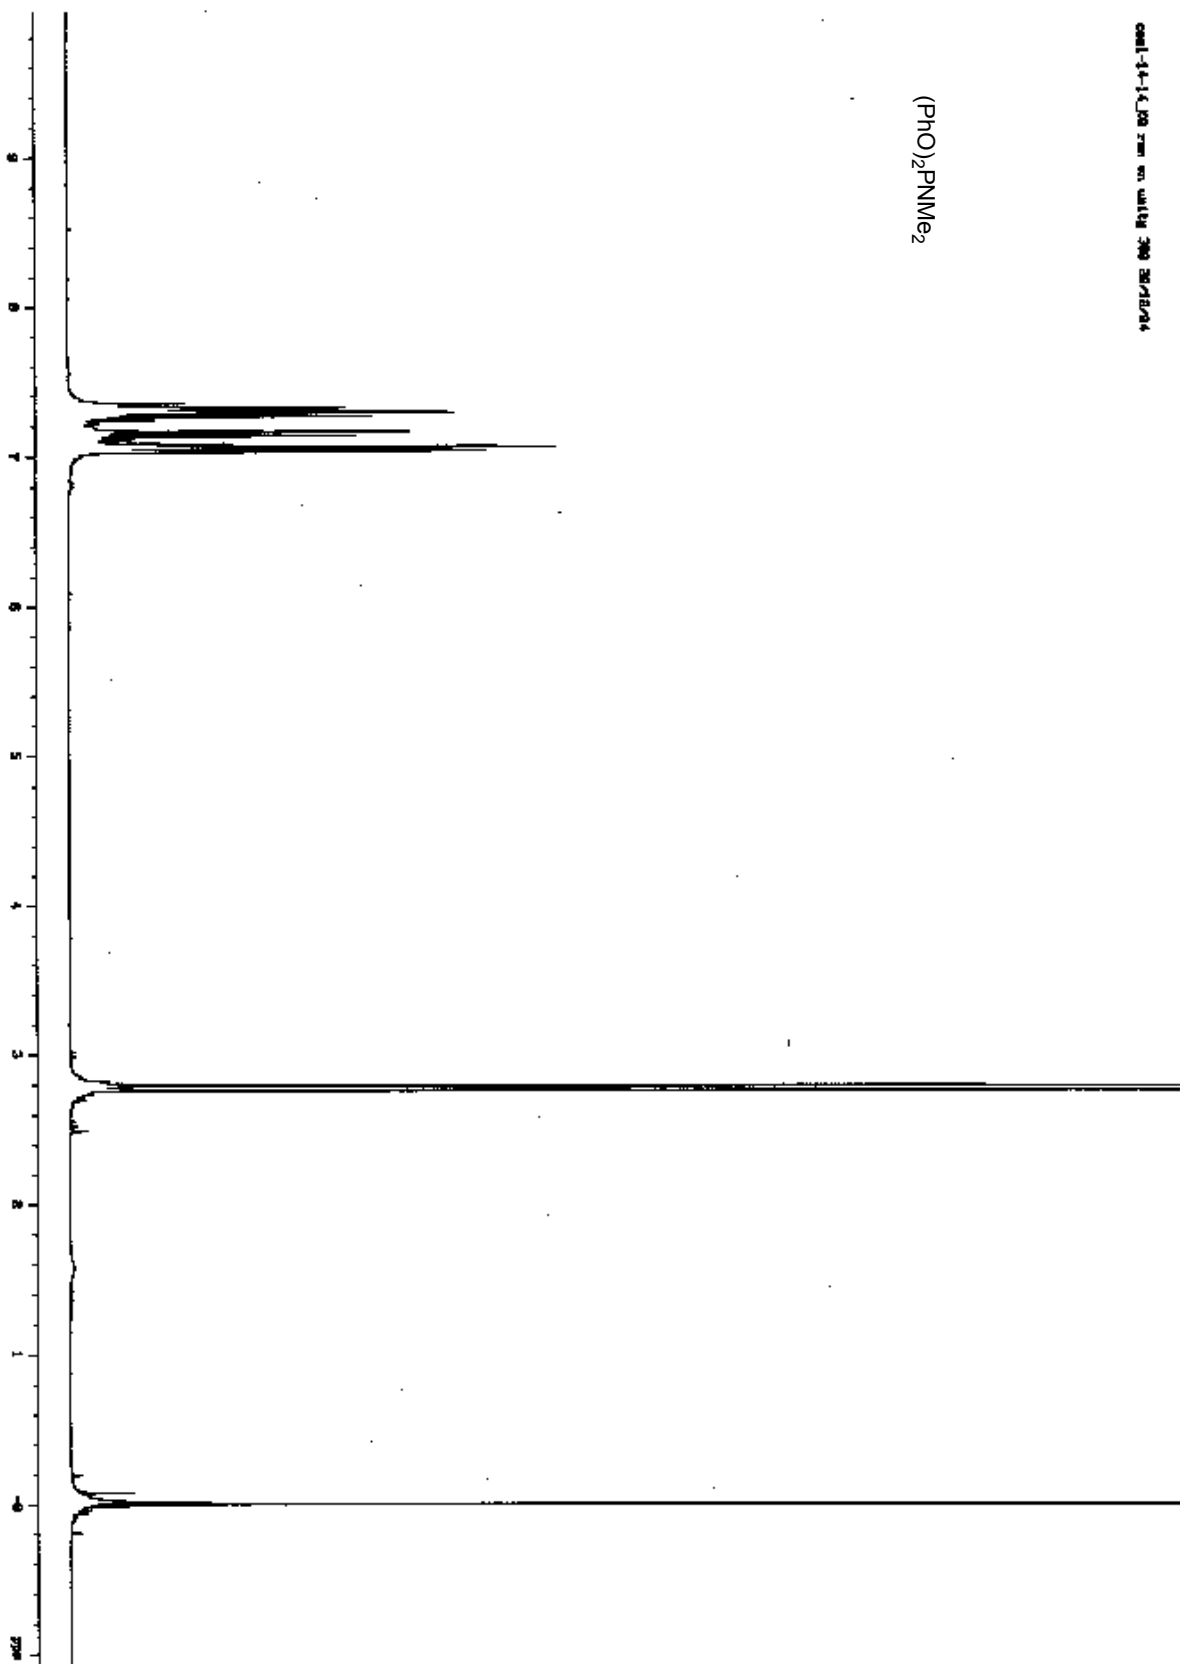

Std proton  
 Sampiran CO-5-82-F2  
 Pulsa Sequence: sfpul  
 Solvent: cdcl3  
 Temp: 45.0 C / 280.1 K  
 Q: 10000 Hz  
 P: 10000 Hz  
 I: 10000 Hz  
 Local: 10000 Hz  
 Reten: 40100.100 sec  
 Pulse: 95.0 degree  
 Acq: 1.00 sec  
 SFO: 100.625 MHz  
 Q: 10000 Hz  
 Q: 10000 Hz  
 Q: 10000 Hz  
 Data: 10000 Hz  
 Data: 10000 Hz  
 FT size: 65536  
 Total time: 8 min, 38 sec

(PhO)<sub>2</sub>P(O)Pr

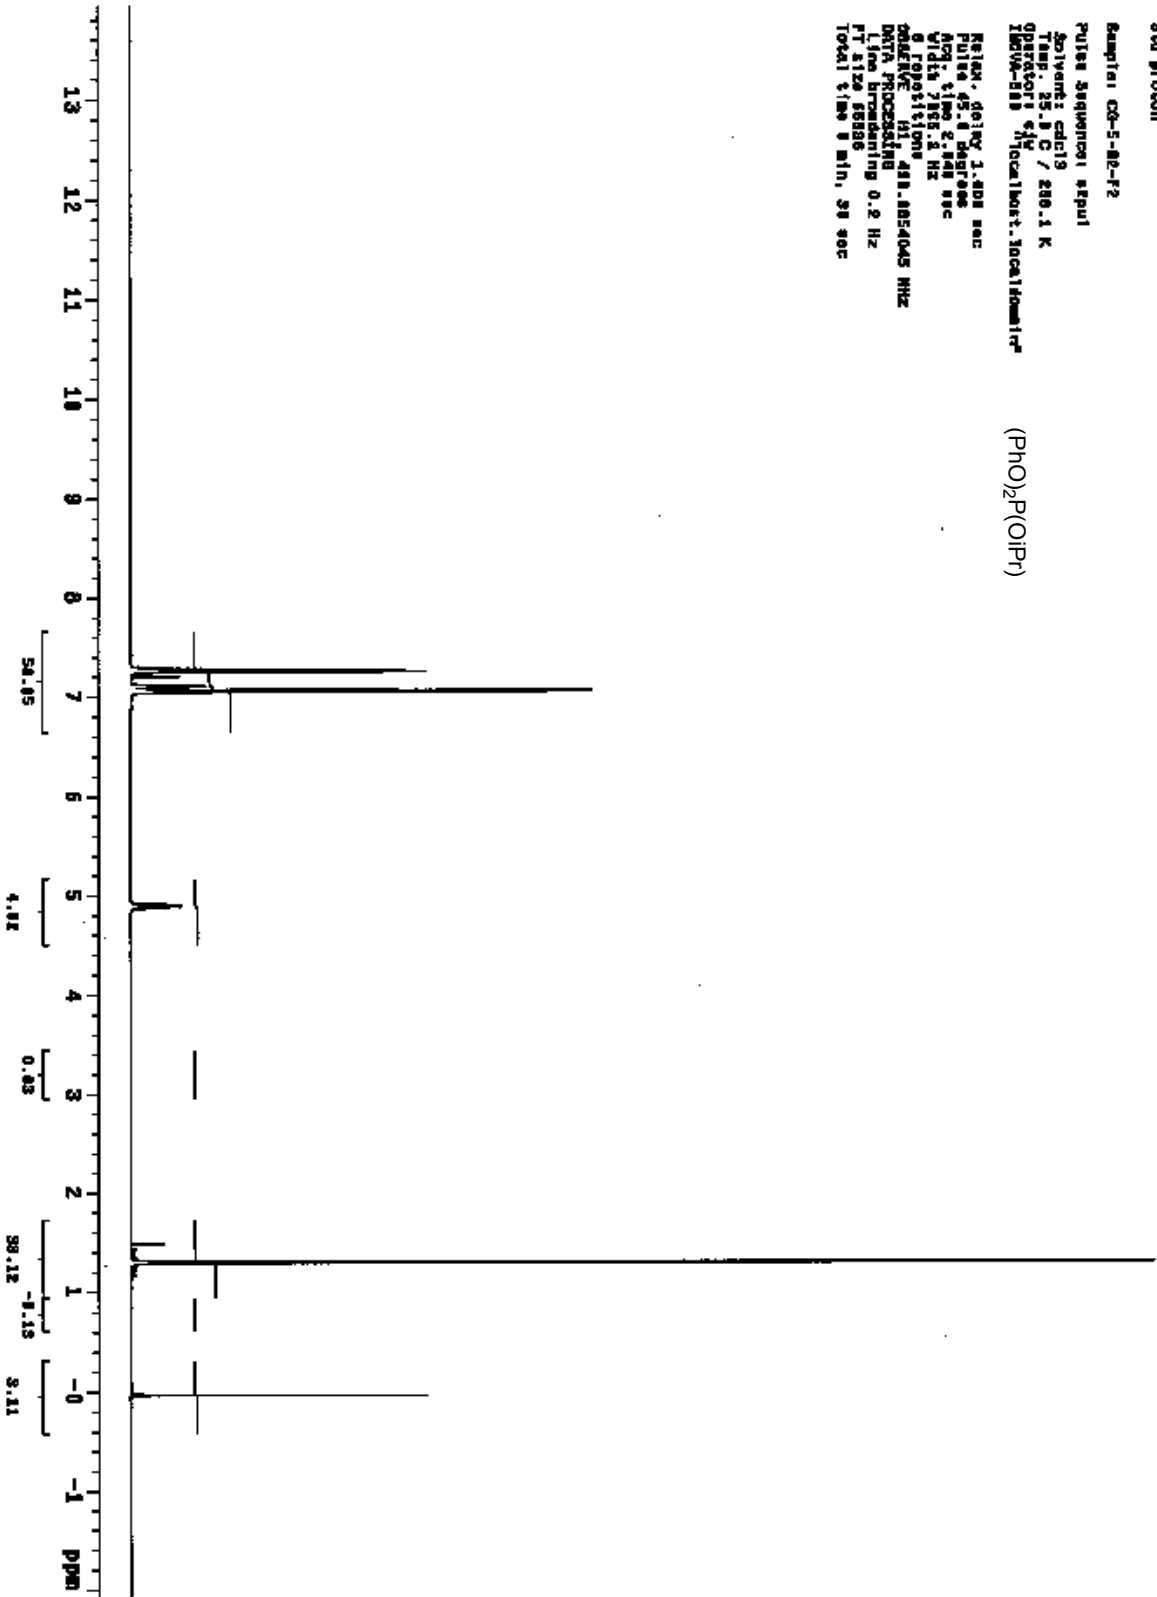

cas-18-21\_08 run on unity plus 880 01/02/05

(PhO)<sub>2</sub>P(O)Pr<sub>1</sub>

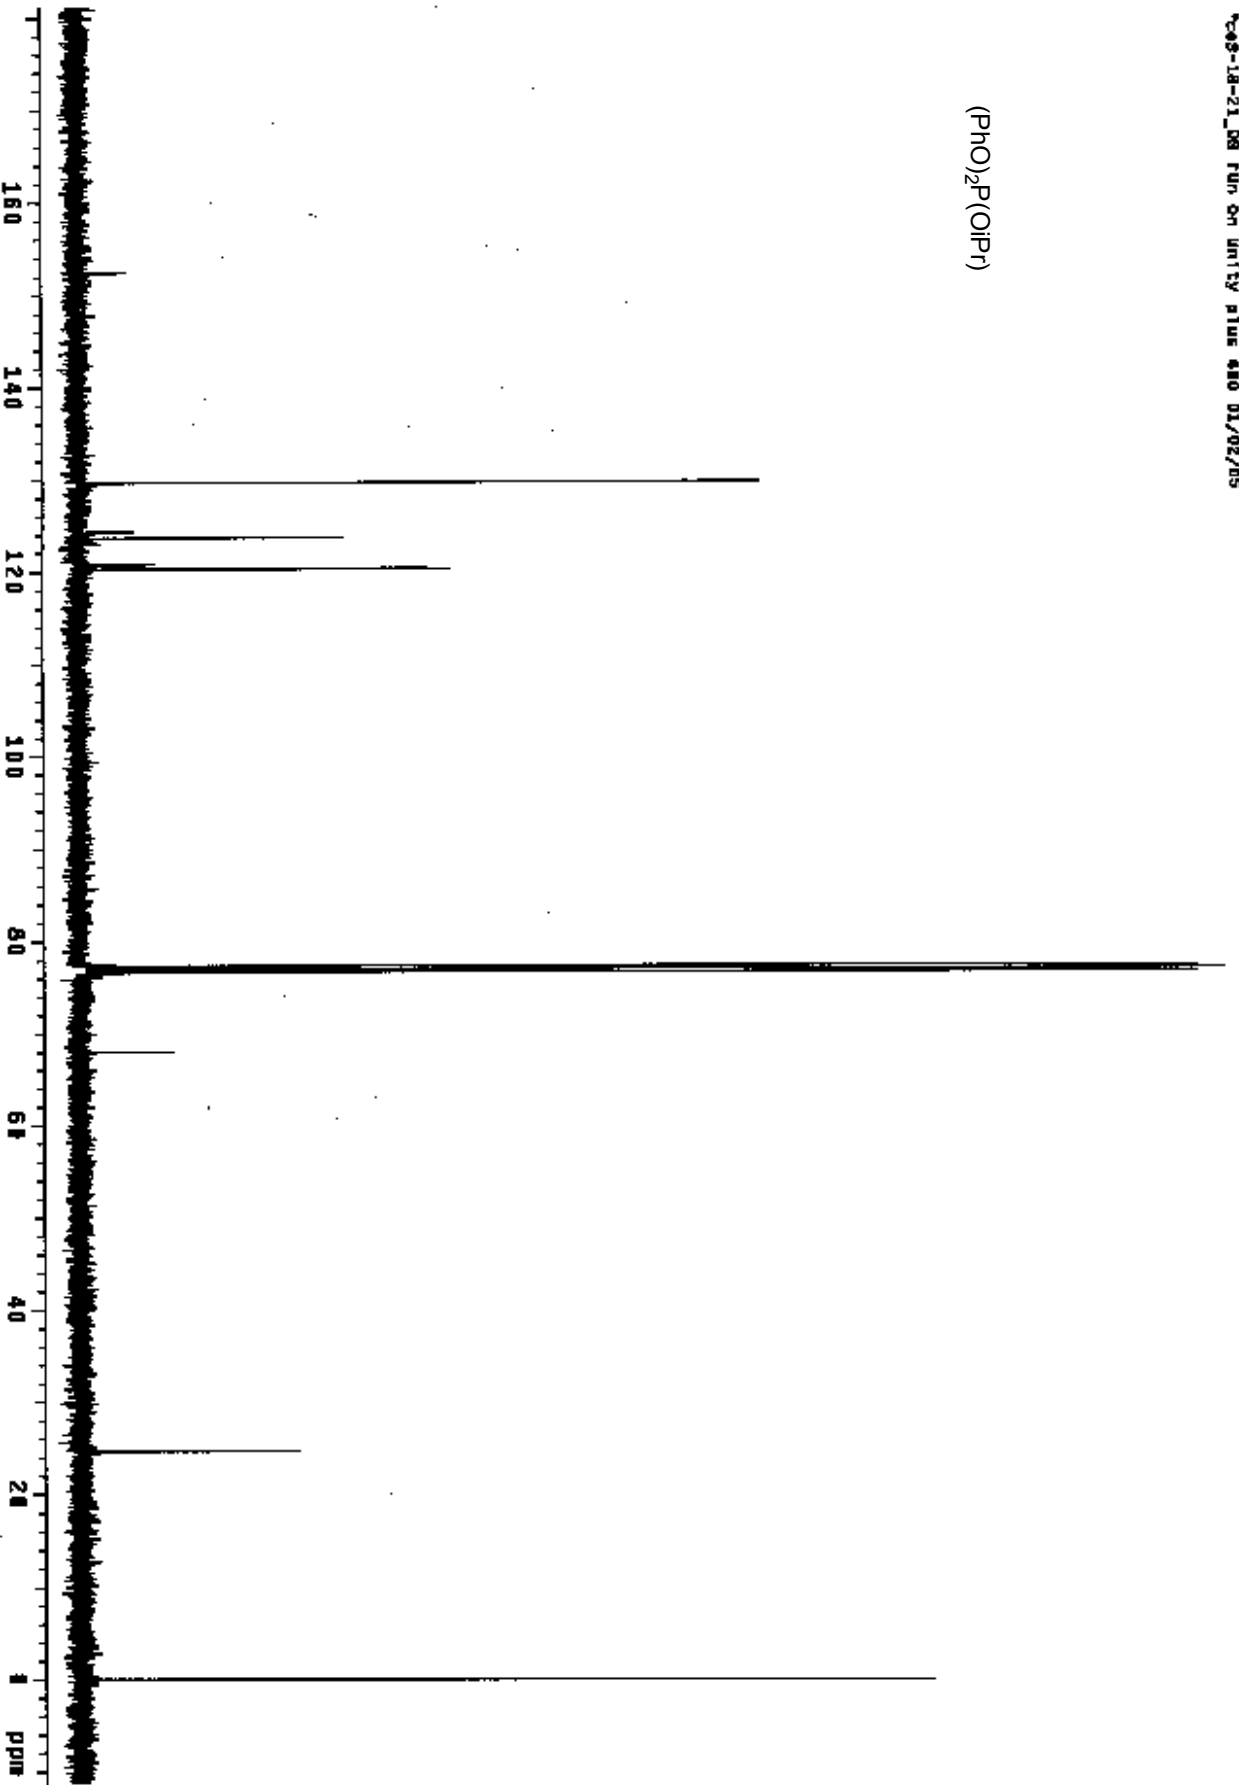

cat-118-118 Fraction 1-28 top spot 16/09/04  
Pulse Sequence: zgpg1

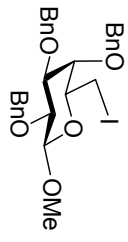

3

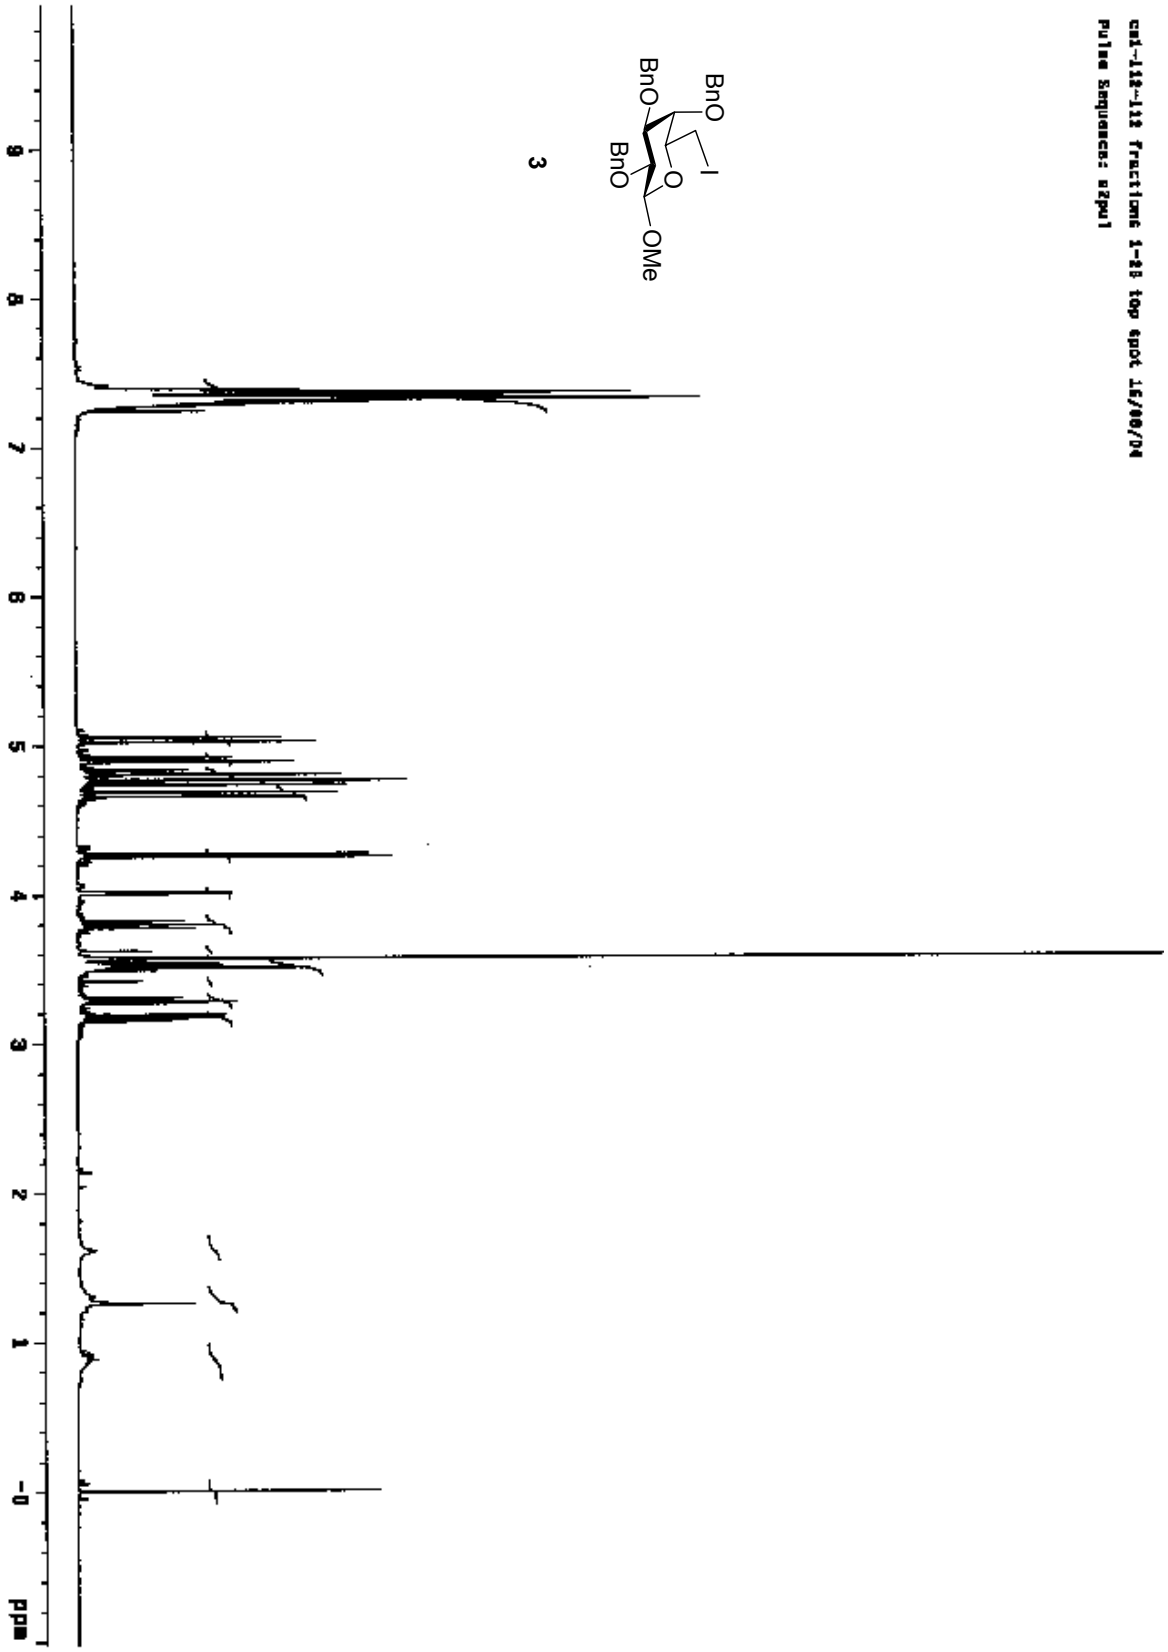

13C NMR SPECTRUM

Pulse Sequence: zgpg30  
Solvent: CDCl3  
Ambient temperature  
SAMPLING: 400 MHz  
Pulse 45.4 degrees  
Acq. Time 1.580 sec  
Width 25000.0 Hz  
1st 2nd 3rd 4th 5th 6th 7th 8th 9th 10th  
OBSERVE C19, 100.873961 MHz  
DECUPLE H1, 500.873961 MHz  
Power 32 dB  
canceled on  
WALTZ-16 MODULATED  
DATA PROCESSING  
LINE BROADENING 1.0 Hz  
PT 1.000000  
PT 1.000000  
Total time 15 min, 45 sec

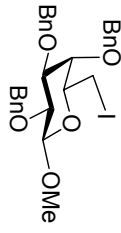

3

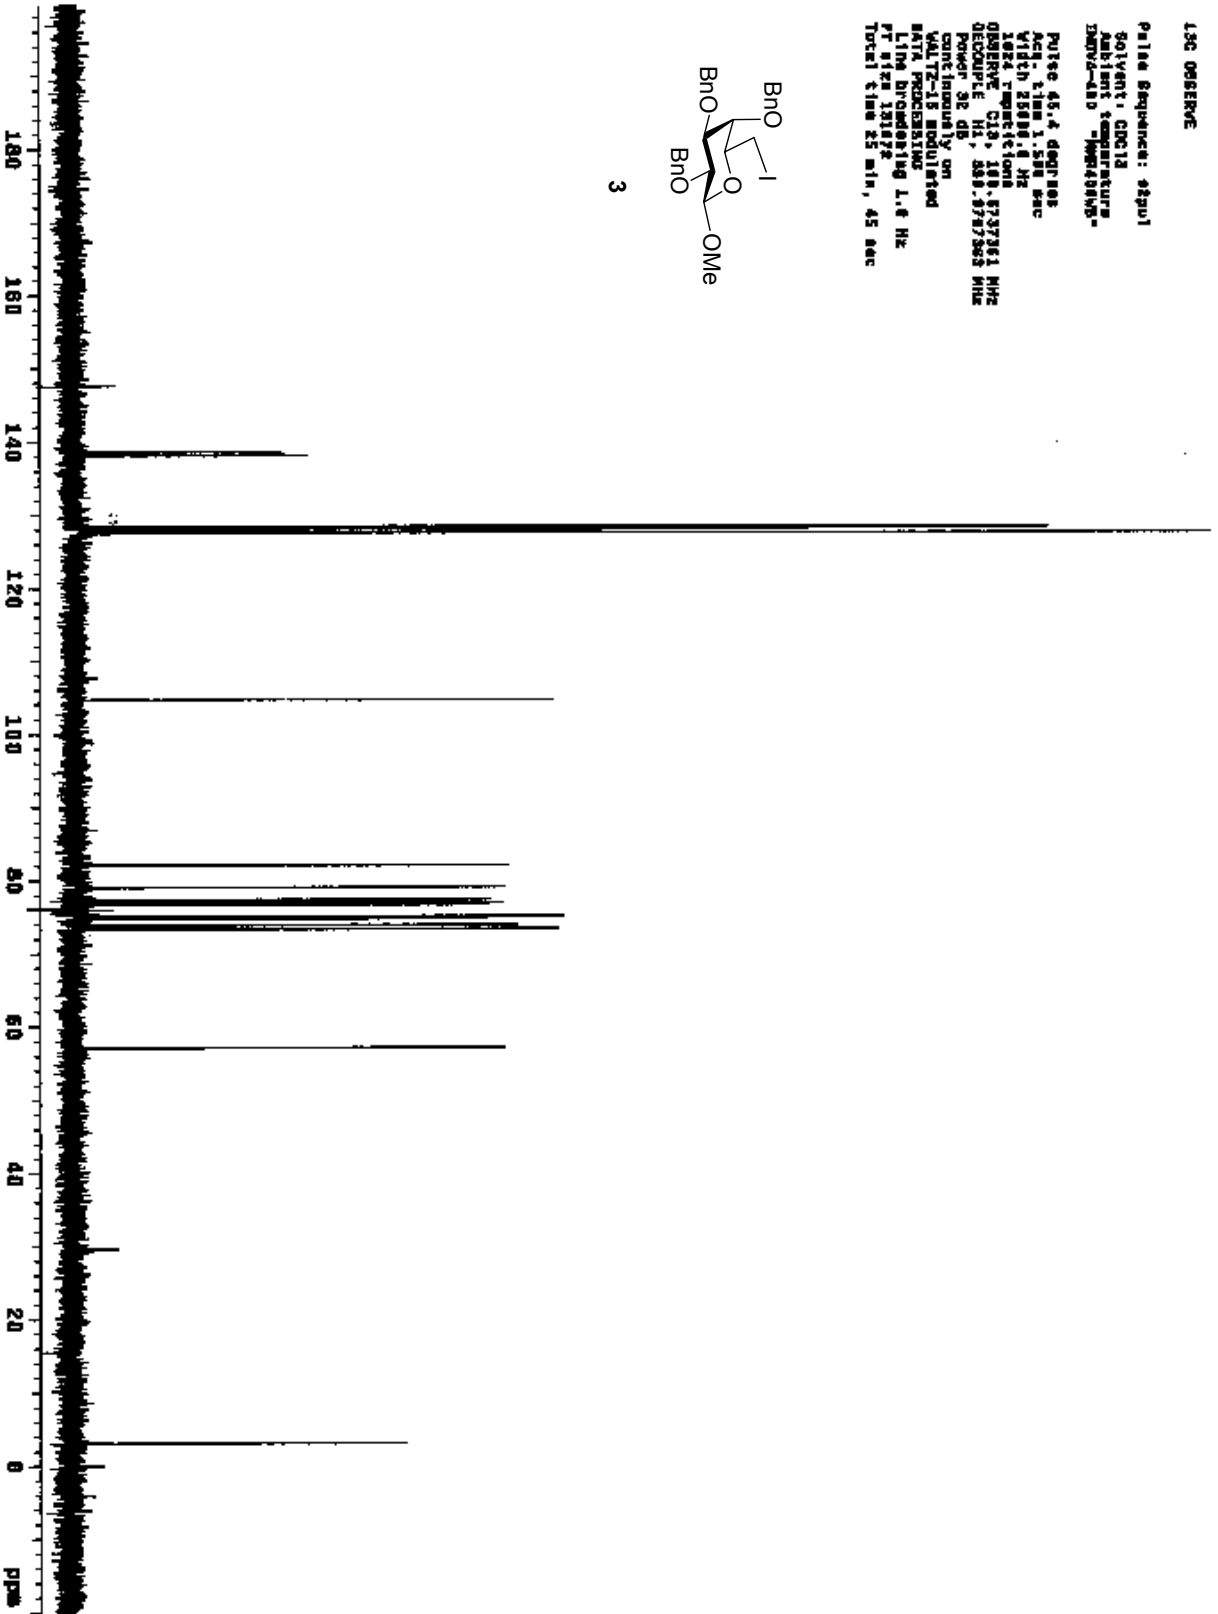

NAME: 24-24 (acrylate) used run on unit by plus AND 11/11/11  
Pulse Sequence: zgpg30

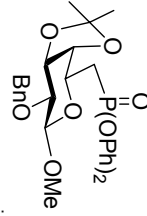

7

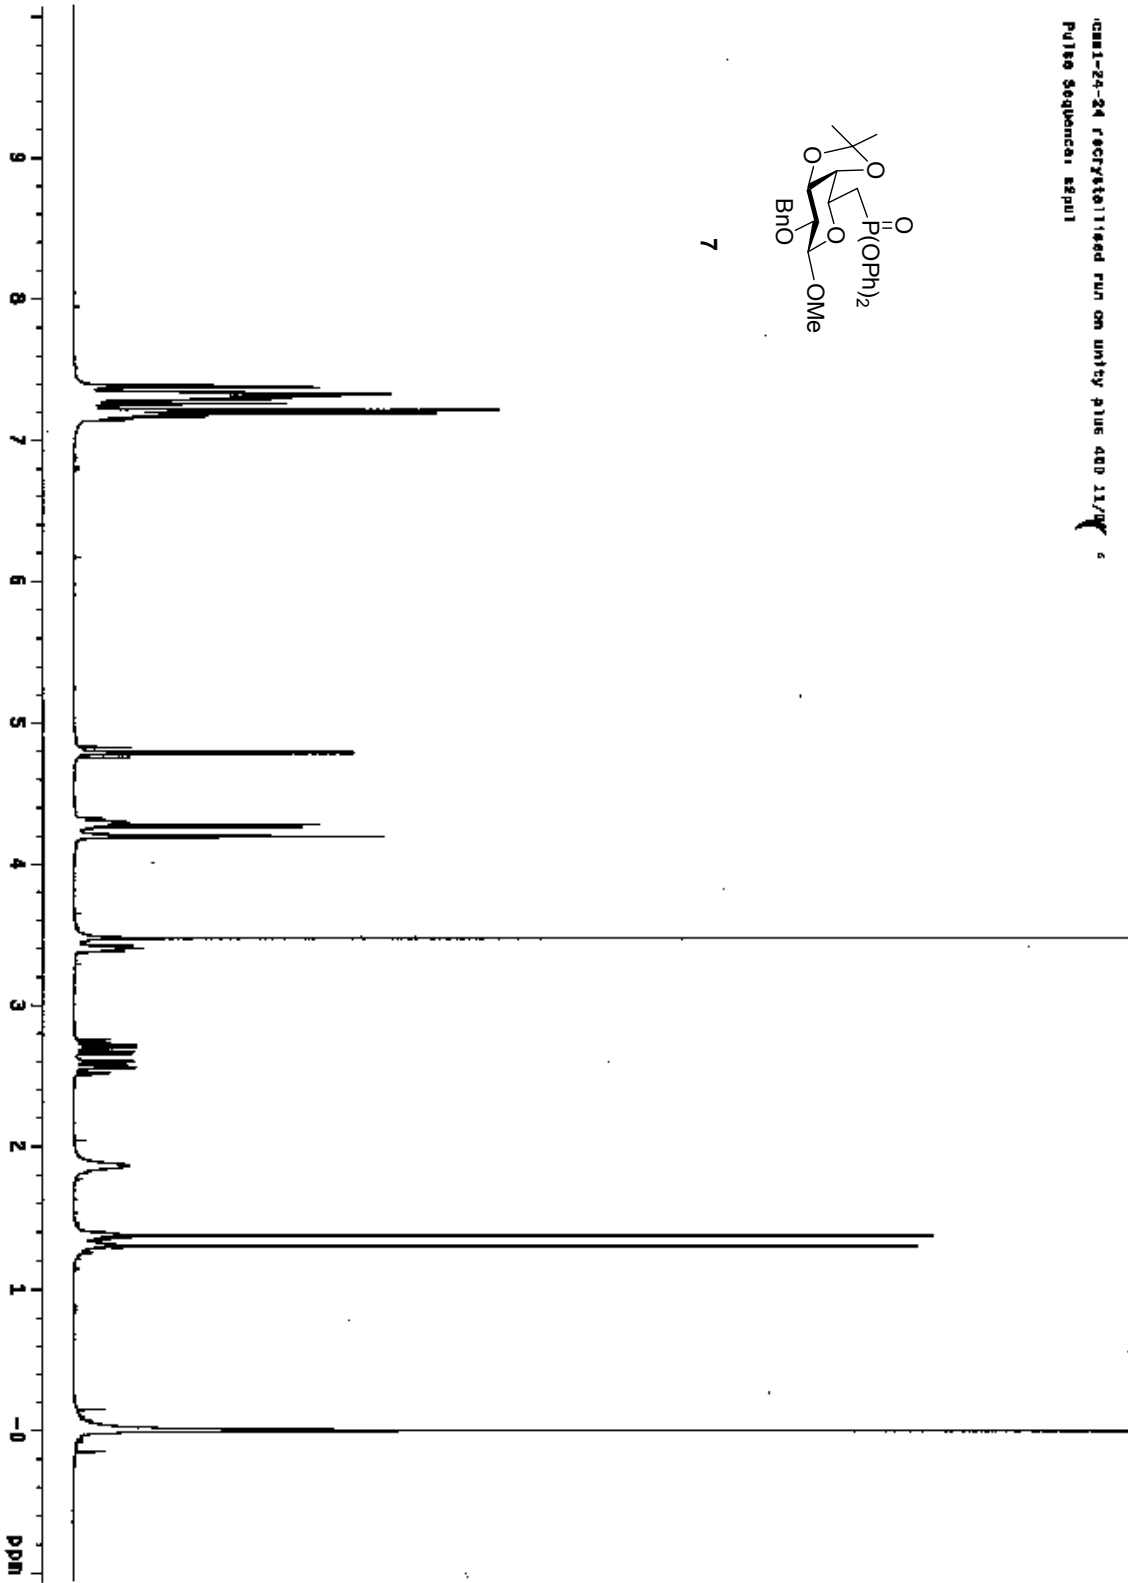

0661-84-84 recrystallised from EtOAc Pet sp run on 400 plus 400 11/01/05

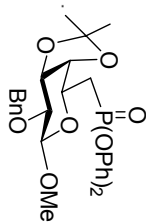

7

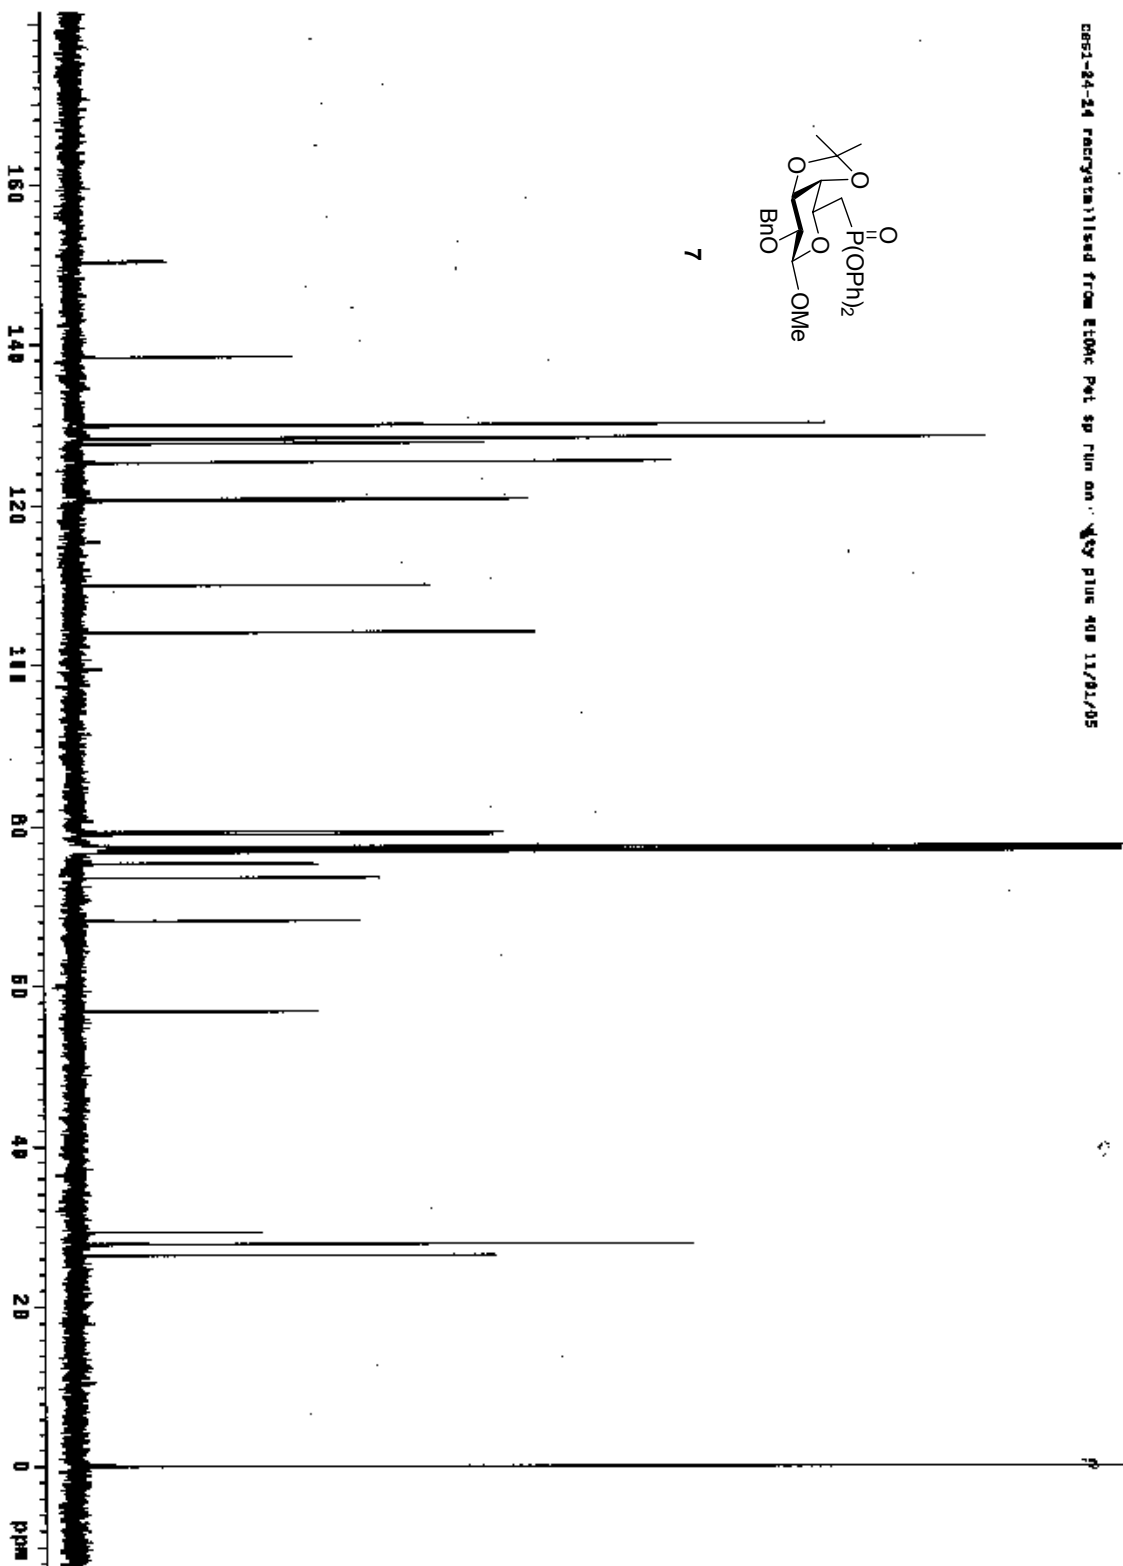



31P  
 CAS-24-28\_P021-39P4 run on INOVA 400 04/04/05  
 Pulse Sequence: zgpg31

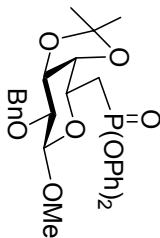

7

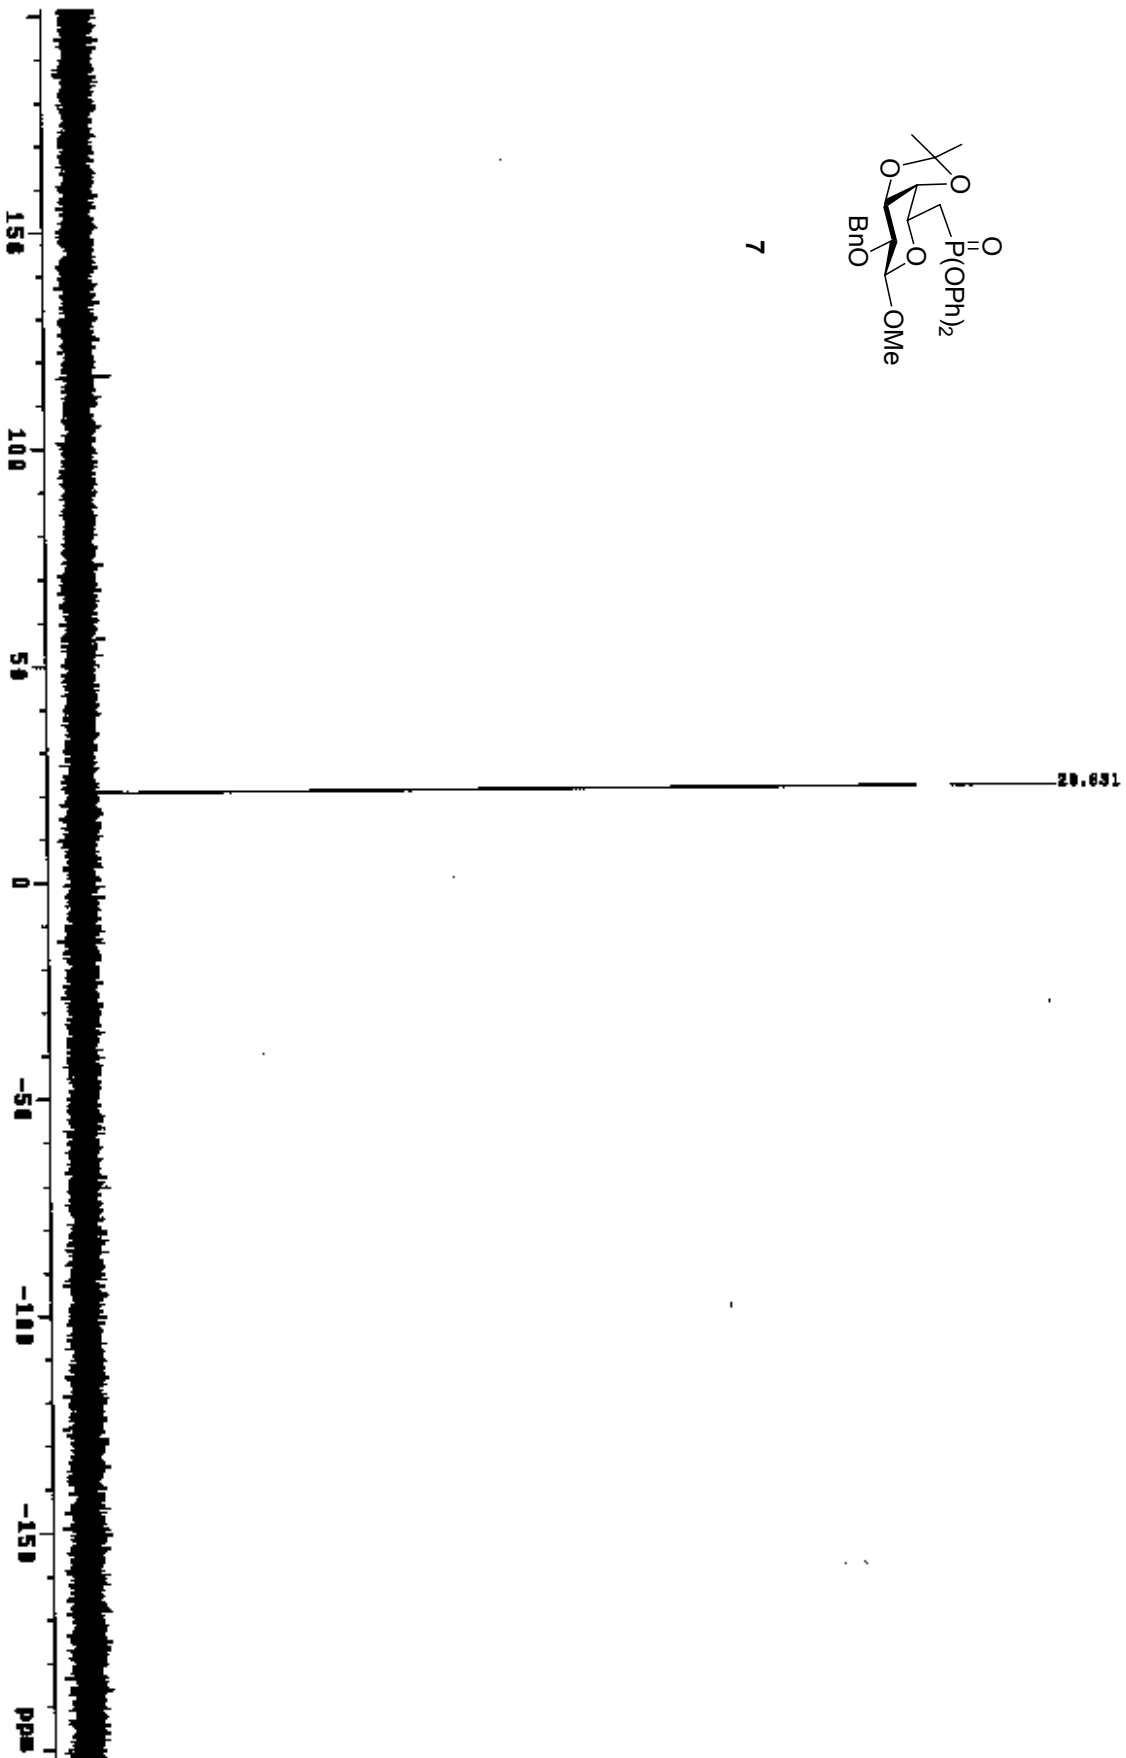

3-3-ALLPATICES combined batches of ribose/ribosephosphate  
Pulse Bankancai ezgüi

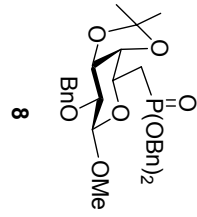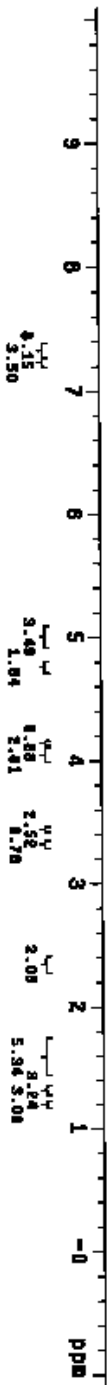

03-08-2011  
Pulsed Sequence: zgpg30

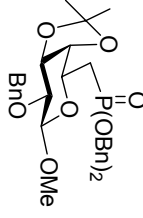

8

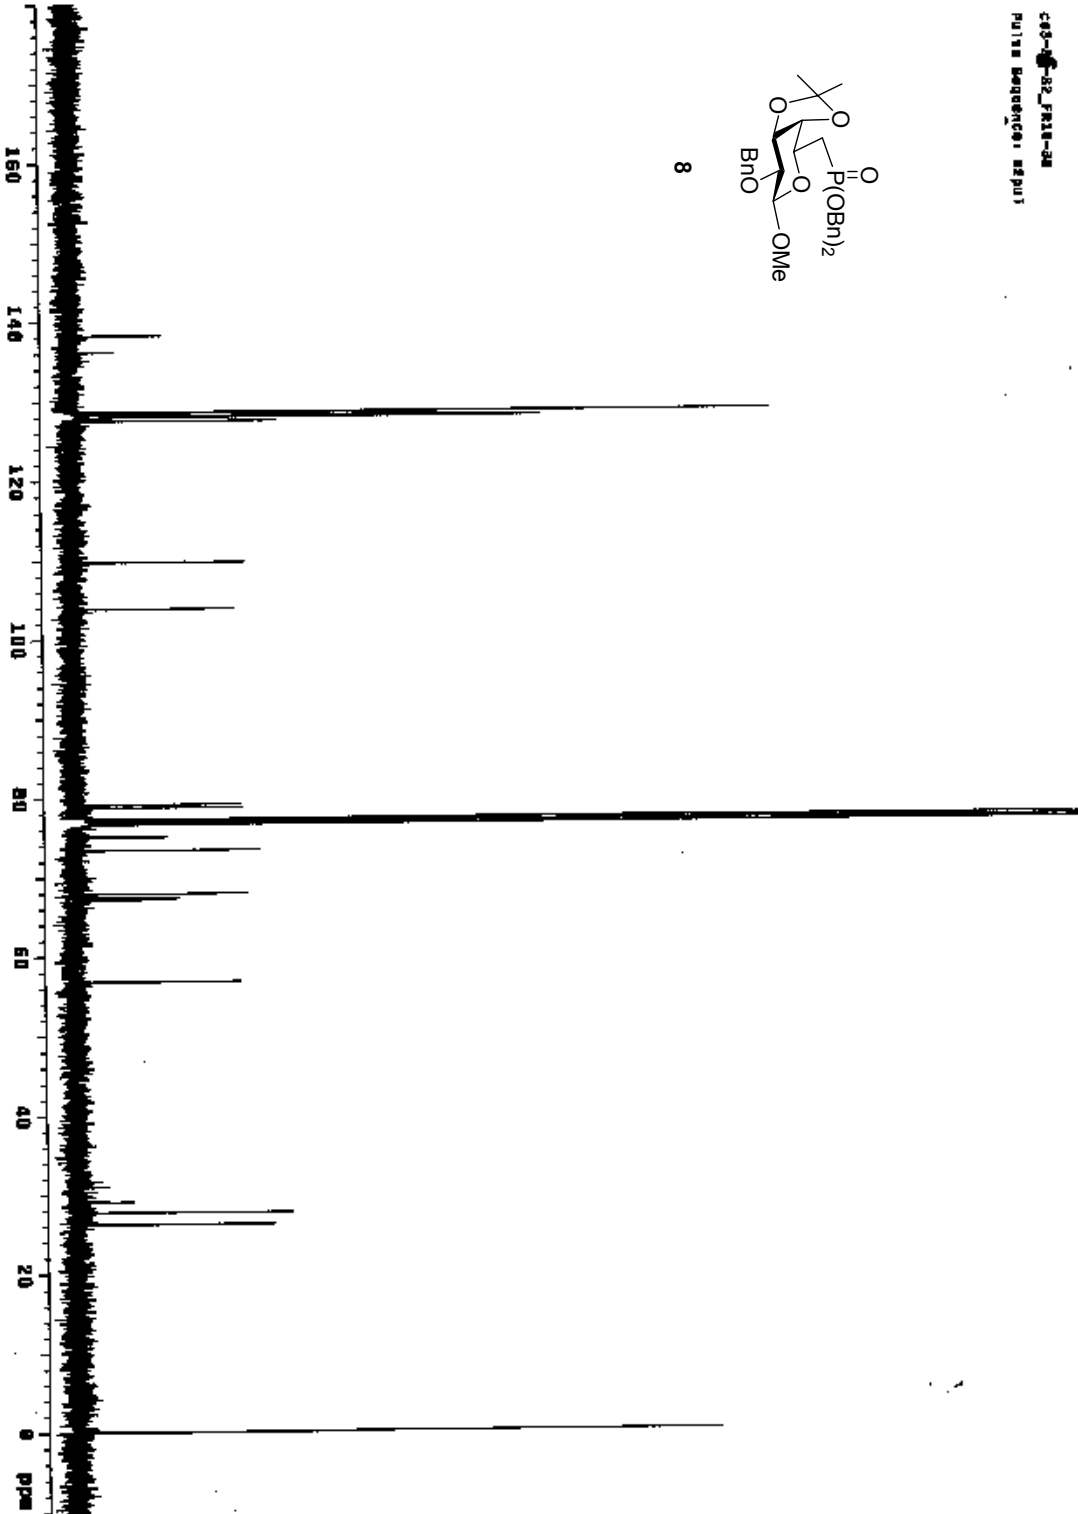

045-30-441.BATCHE66 31P run on 1mprova 400 04/04/15  
Pulse sequence: vzpa1

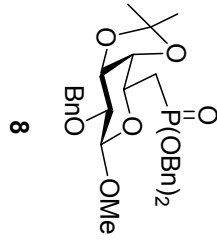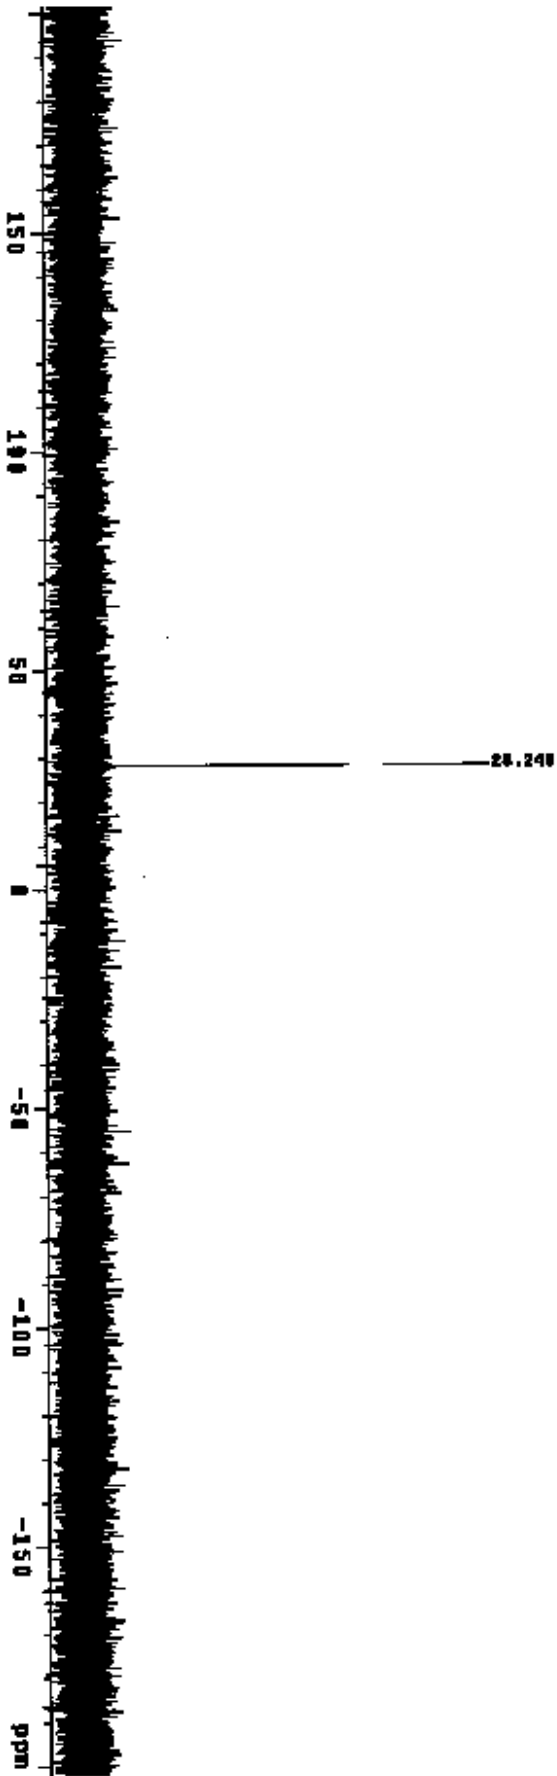

10-24-80

Pulse Sequence: zgpg30  
 Solvent: d2o  
 Ambient Temperature  
 Director: njw  
 INOVA-400 13C/1Houbt. Local Admin/1/4

Ratio: d1w/1.000 sec  
 Pulse: 48.0 degrees  
 Acq: 1.000 2.000 sec  
 Width: 6300.0 Hz  
 4 repeats/1.000 sec  
 OBSERVE: H1, 393.758178 MHz  
 SMTA PROCESSING  
 1.000 80000  
 1.000 80000  
 Total Time: 9 min., 38 sec

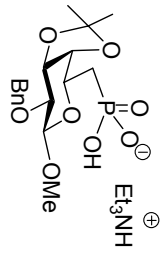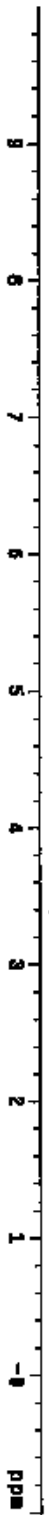

<sup>31</sup>P NMR  
 Sample: ~~1000000~~ [4-~~2~~]-~~6~~  
 Pulse sequence: zgpg30  
 Solvent: d<sub>2</sub>O  
 Temp: 20.0 C / 293.1 K  
 Operator: vlv  
 INOVA-400 10cmhnut.localidmain1  
 Relax. delay: 1.200 sec  
 Pulse: zgpg30  
 Acq. time: 1.288 sec  
 Width: 2415.8 Hz  
 178 repetitions  
 OBSERVE: 31P 100.625000 MHz  
 DECOUPLE: 13C 101.250000 MHz  
 CHANNEL: 31P  
 Copied from:   
 Contained by:   
 DATE\_ PROCESSED:   
 File browser: 1.0 Hz  
 FT size: 80836  
 Total time in hr.: 42 min, 00 sec

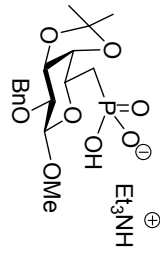

11

| INDEX | FREQUENCY | PPM     | HEIGHT |
|-------|-----------|---------|--------|
| 1     | 12891.280 | 127.684 | 29.5   |
| 2     | 12087.334 | 118.408 | 67.5   |
| 3     | 12080.863 | 118.329 | 65.3   |
| 4     | 12074.284 | 118.473 | 61.7   |
| 5     | 11189.038 | 111.113 | 39.8   |
| 6     | 10369.630 | 103.383 | 26.0   |
| 7     | 8669.182  | 74.818  | 26.2   |
| 8     | 7331.749  | 73.386  | 26.5   |
| 9     | 7718.717  | 76.653  | 14.8   |
| 10    | 7618.256  | 75.569  | 13.4   |
| 11    | 7420.698  | 73.805  | 20.7   |
| 12    | 7400.810  | 73.292  | 24.3   |
| 13    | 5789.317  | 57.695  | 39.3   |
| 14    | 5358.112  | 53.238  | -4.7   |
| 15    | 4794.688  | 47.648  | 68.2   |
| 16    | 3149.327  | 31.261  | 10.4   |
| 17    | 2814.328  | 28.050  | 10.4   |
| 18    | 2772.182  | 27.578  | 20.9   |
| 19    | 2607.810  | 25.844  | 31.2   |
| 20    | 888.401   | 8.928   | 89.0   |

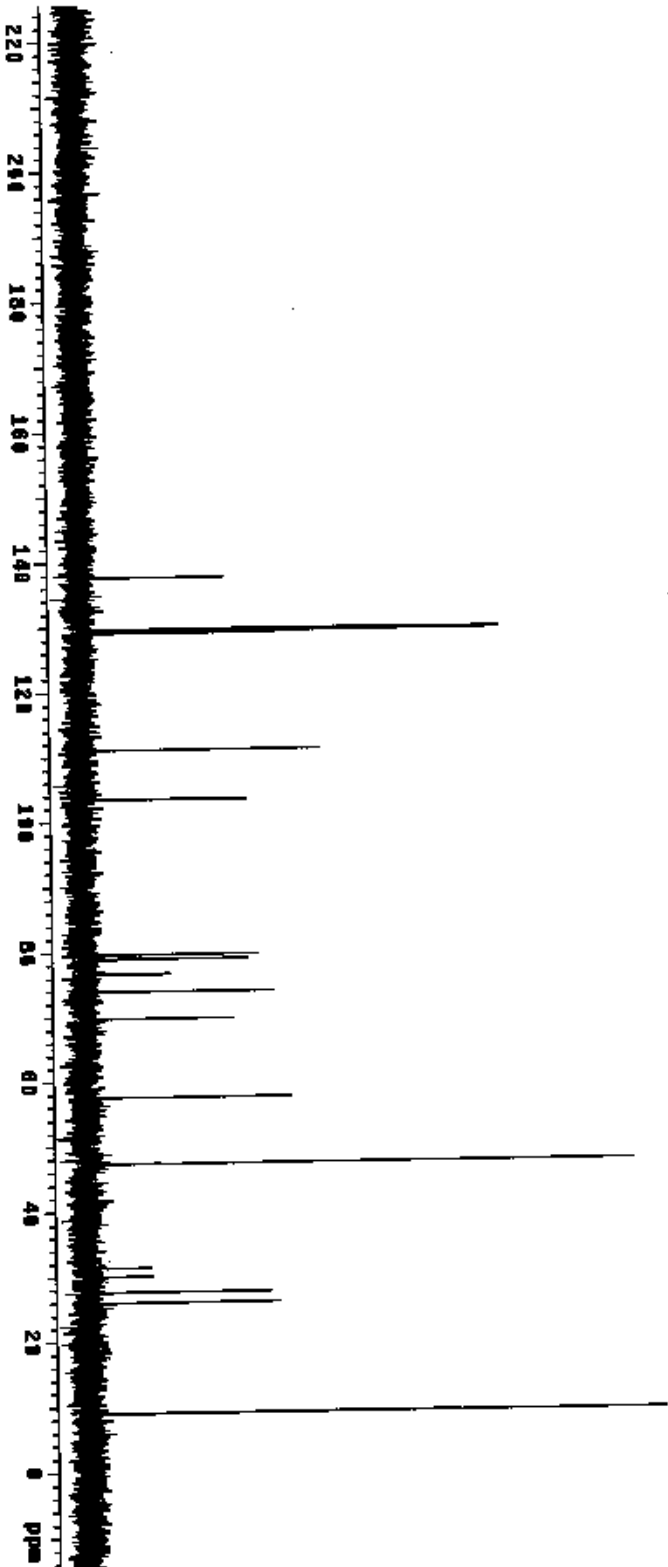



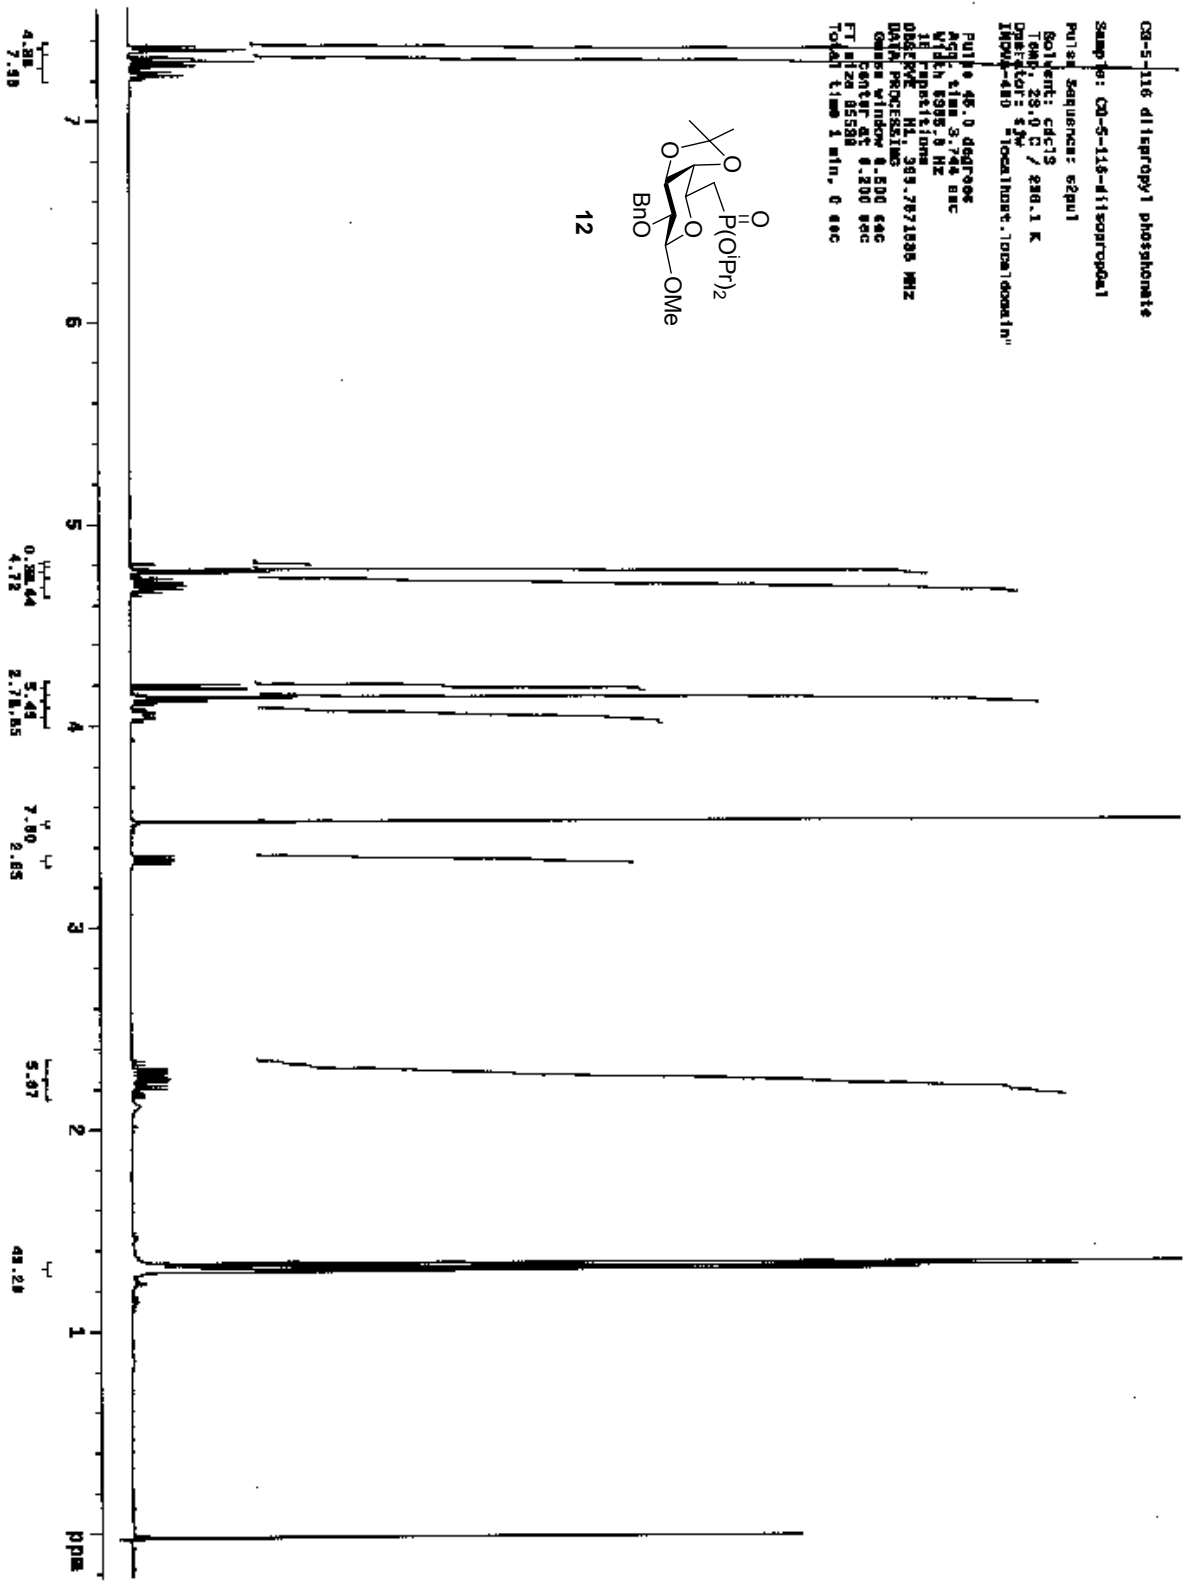



Std proton

Sample: G3-5-115-111501r000a1  
 Pulse Sequence: sgpu1  
 Solvent: cdcl3  
 Temp: 25.0 C / 286.1 K  
 Operator: m...  
 INOVA-400 Localhost: localhost:317

Relax: delay 1.700 sec  
 Pulse: 45.0 degree  
 Acq. time: 1.380 sec  
 Width: 2312.5 Hz  
 S/F: 100.628159 MHz  
 RESERVE: C13: 100.628159 MHz  
 DECOUPLE: H1: 500.136159 MHz  
 Continuously on  
 WALTZ-16 scheduled  
 DATA PROCESSING  
 Line broadening: 1.0 Hz  
 FT: 128 65536  
 Total time: 16 hr, 42 min, 56 sec

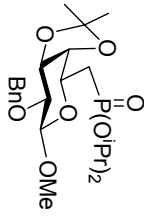

12

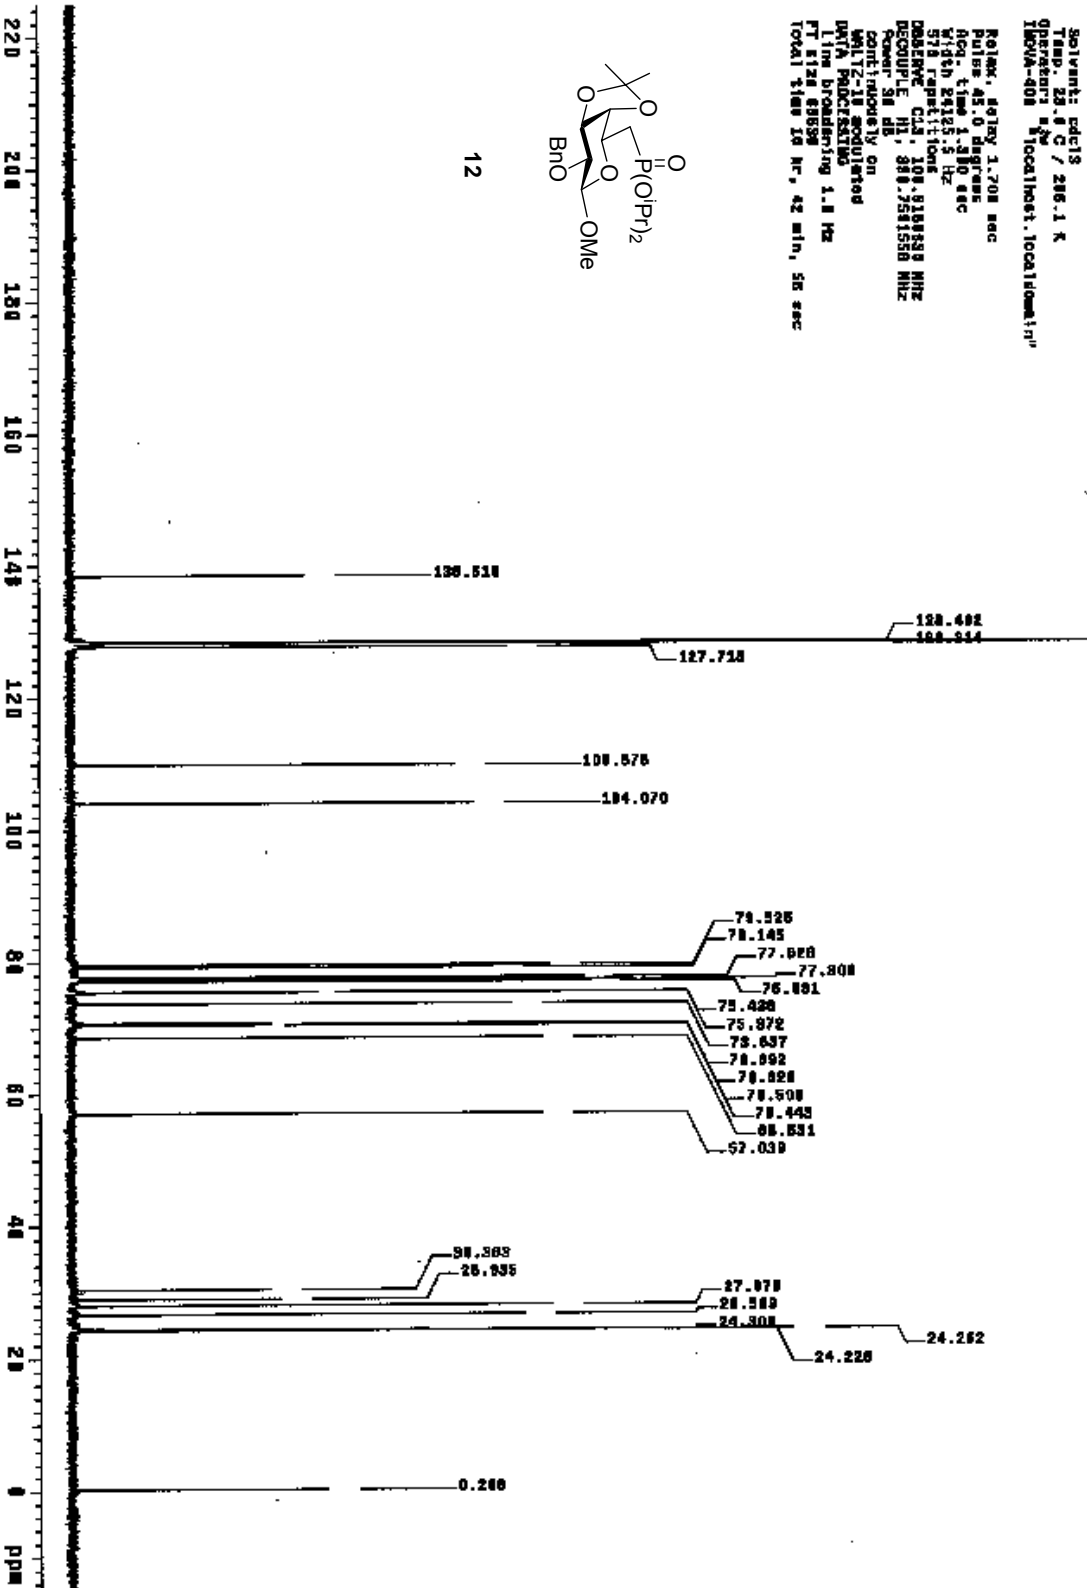

05-16-10\_JRM\_18-17\_28-28 run on 100ms 400 05/04/05  
Pulse sequence: zgpg1

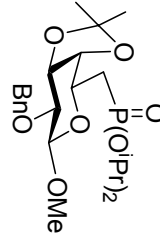

12

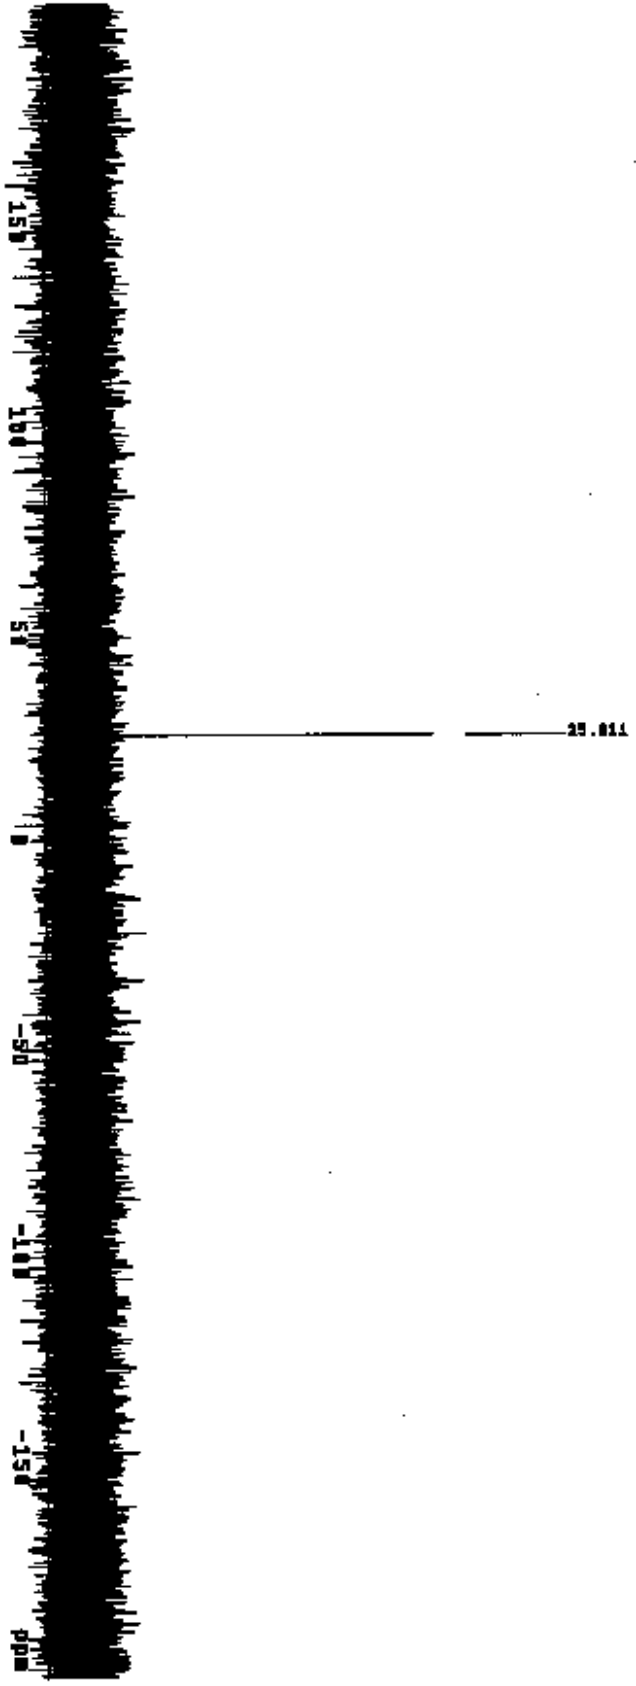

10-29-64 F14-26  
 51d proton

Pulse Sequence: ezau1  
 Solvent: cdcl3  
 Acquire Temperature  
 Operator: sju  
 INOVA-400 500MHzpt. localdominr  
 Relax: delay 1.800 sec  
 Pulse: 45.8 degrees  
 Acq. time 2.888 sec  
 Width 6989.0 Hz  
 S. Repetitions  
 OBSERVE H1, 398.7571587 MHz  
 DATA PROCESSING  
 Line broadening 1.2 Hz  
 FT size 65536  
 Total time 8 min, 58 sec

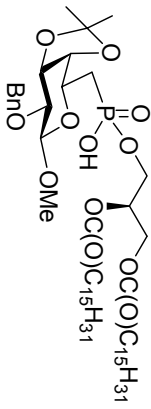

13

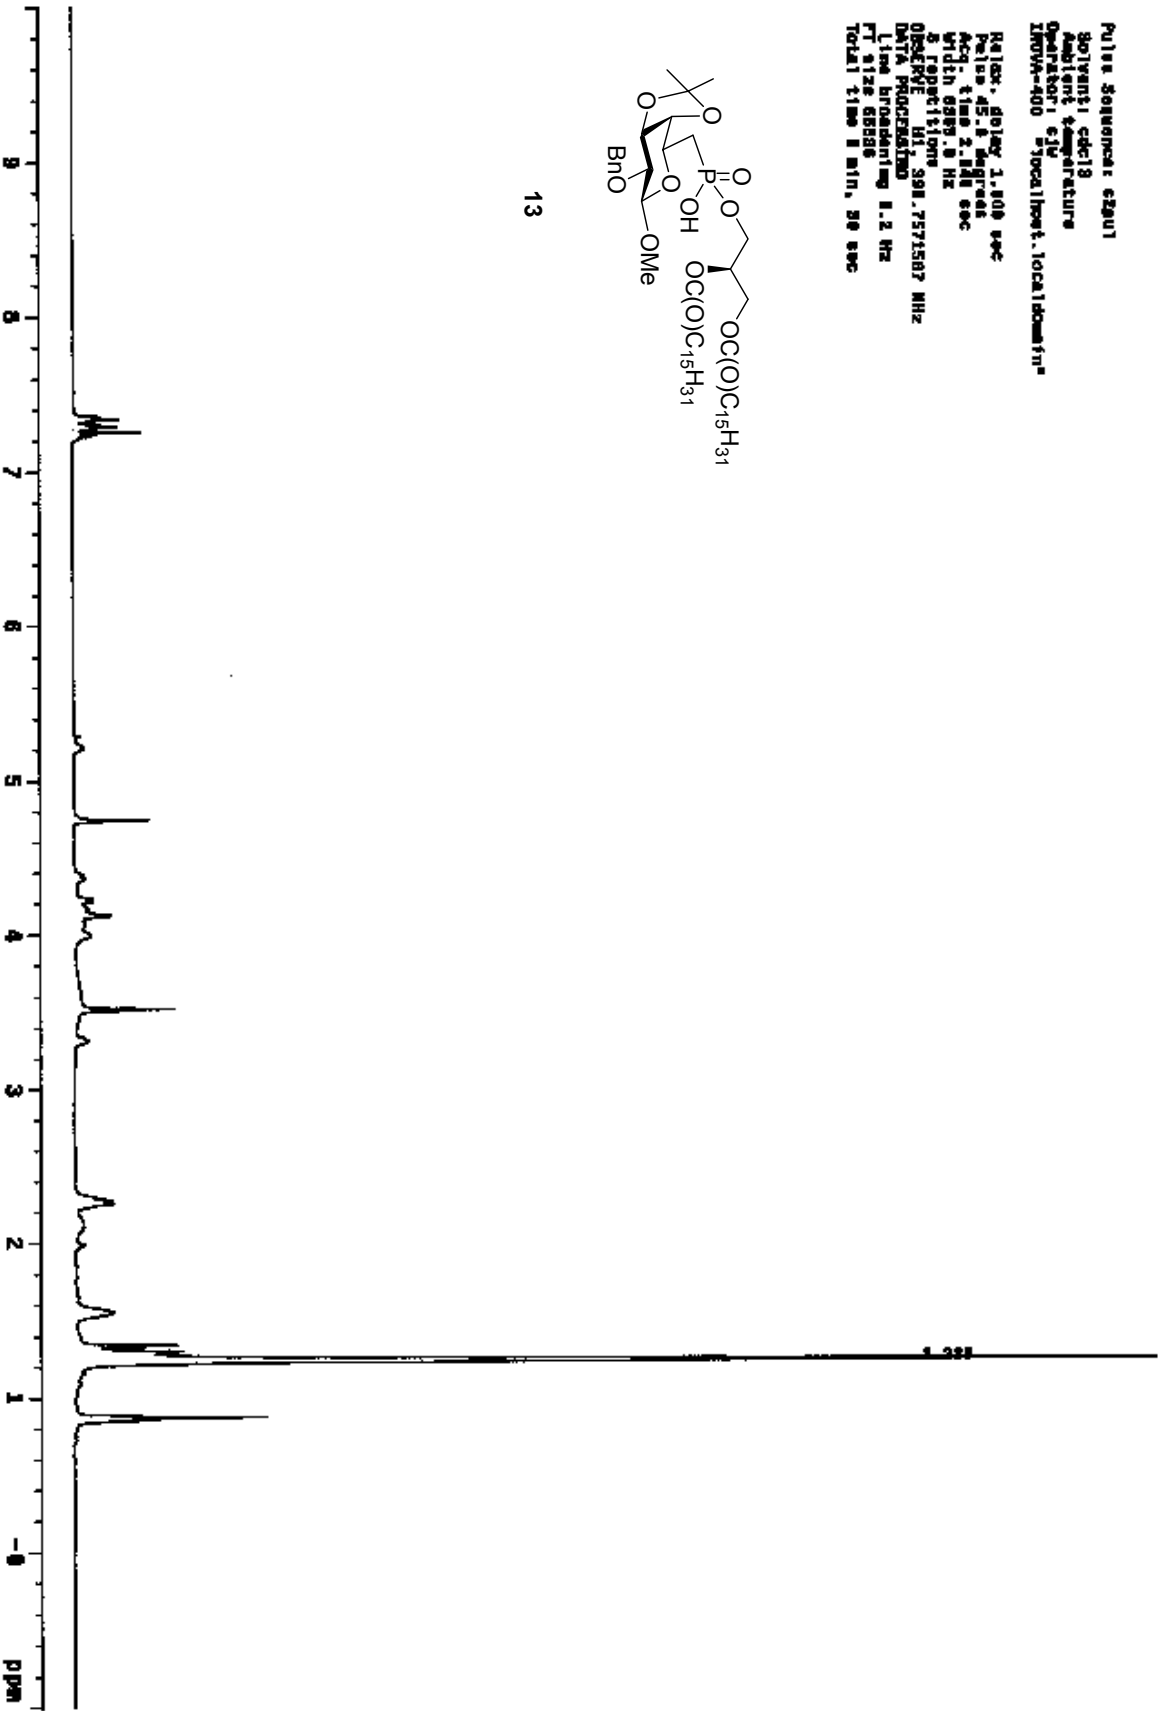

13-20-04-130-124-28

Polymer Name: 369M1  
 Solvent: CDCl3  
 Ambient Temperature  
 Operator: sly  
 ID: 130-124-28  
 Total Time: 100.1500 min

Pulse: 4.100 sec  
 Pulse Pr: 0.000000 sec  
 Acq Time: 1.300000 sec  
 F1: 101.325000 MHz  
 F2: 101.325000 MHz  
 DECADE: C13, 100, 53.80178 MHz  
 DECADE: H1, 400, 253.15500 MHz  
 Power: 20 dB  
 Continuum: On  
 SALT: 16 mol/L  
 DATA PROCESSING  
 Line Broadening: 0.5 Hz  
 FT: 1638555  
 Total Time: 6 hr, 24 min, 55 sec

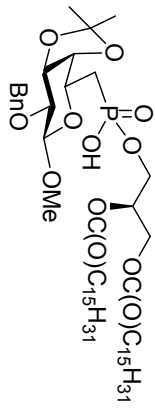

13

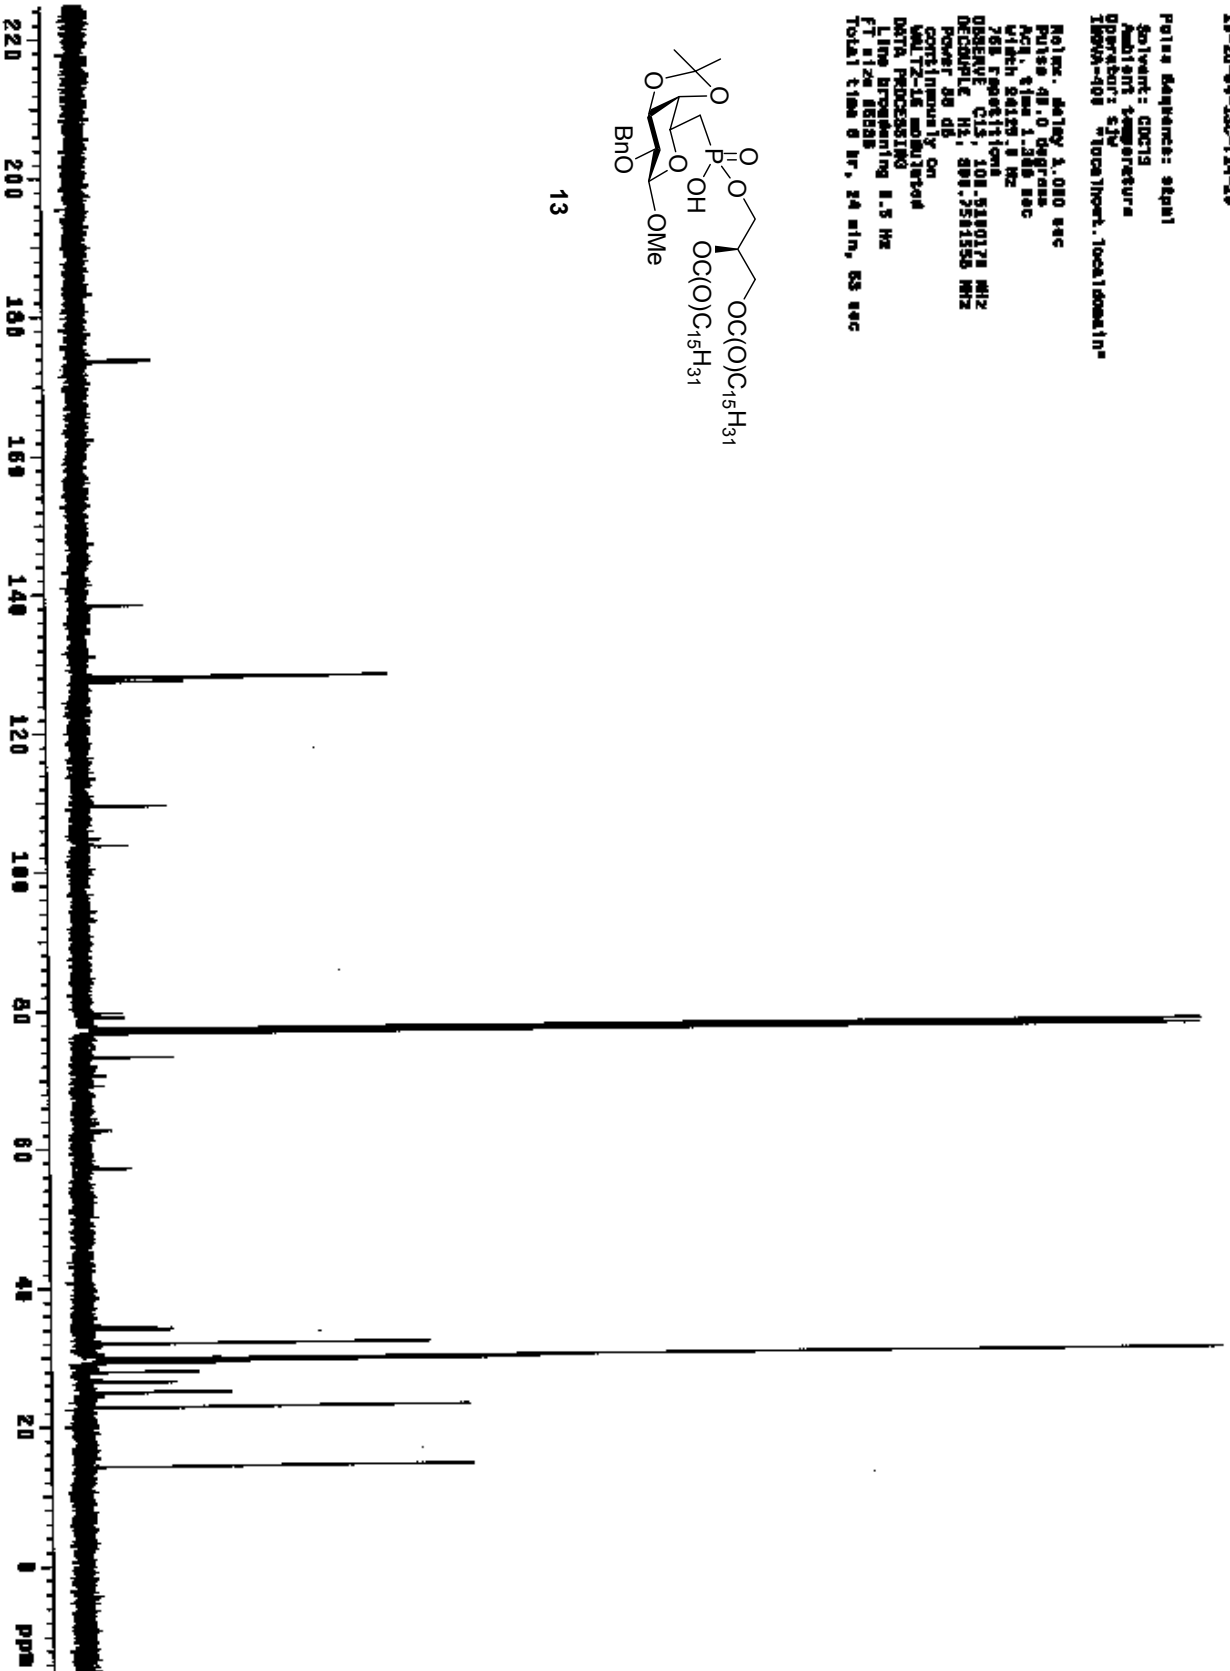

C80-12-18\_FR3\_31-50 run on linux 401 28/04/85  
Pulse Sequence: vzpu1

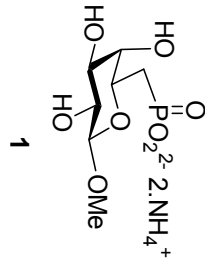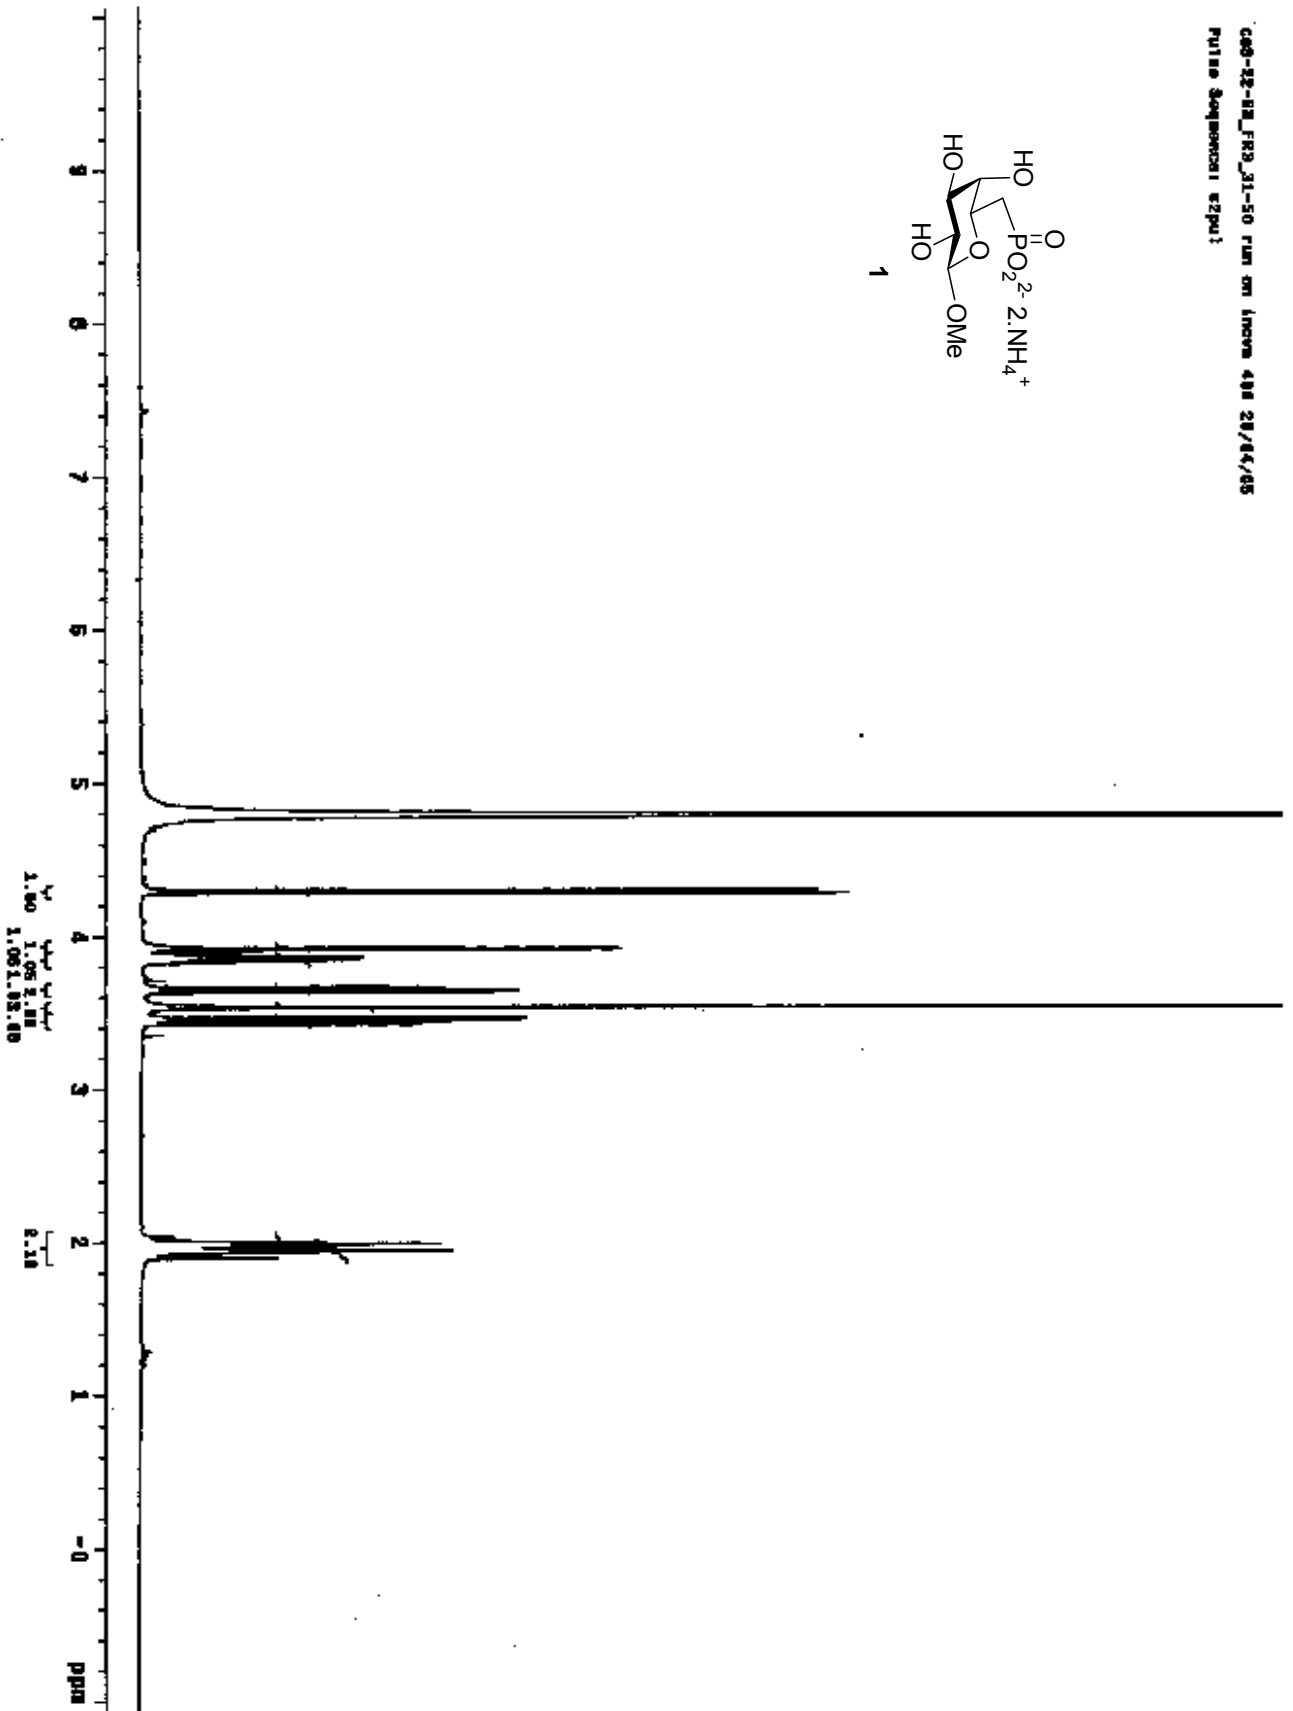

040-23-00\_F02\_31-01 run on Inova 400 25/04/05  
Pulse Sequence: zgpg30

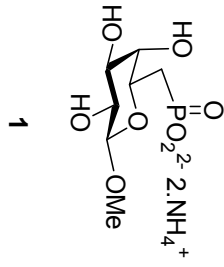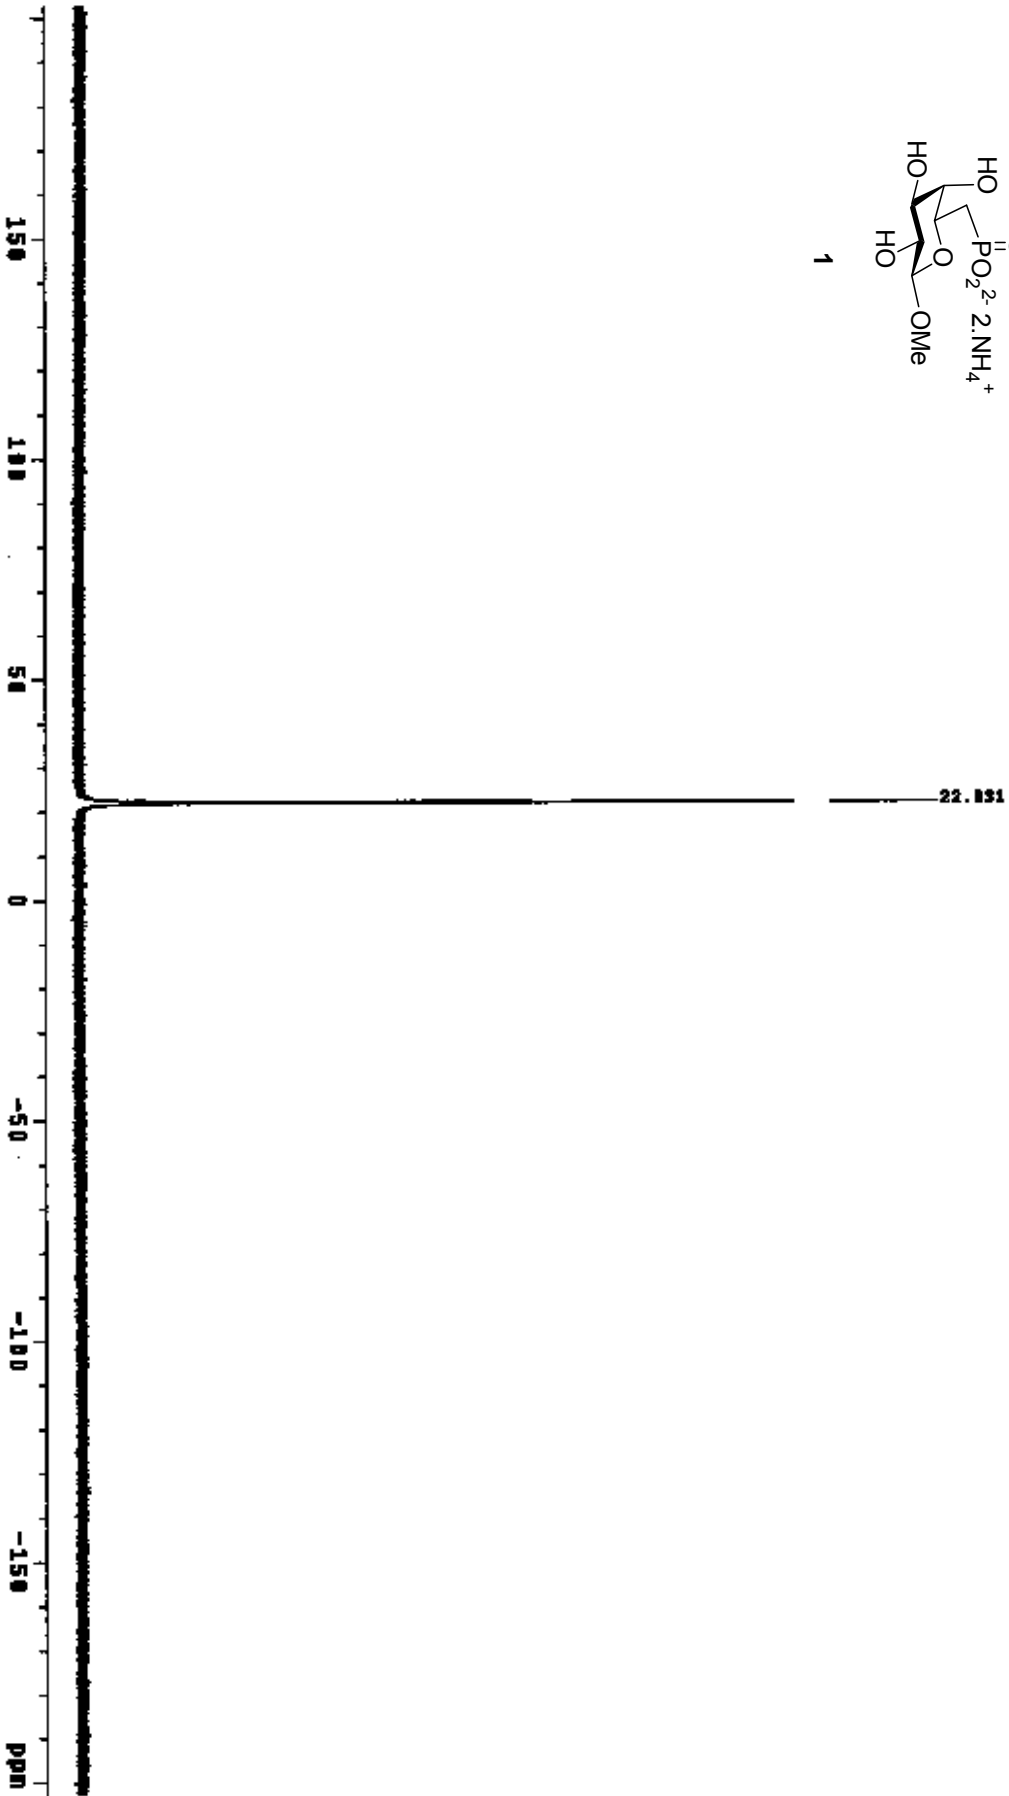

18-28-84

Sample: 18-28-84  
 Pulse Sequence: zgpg30  
 300K  
 Ambient Temperature  
 Operator: sju  
 INOVA-413 "10001M05C.K01210001"

Relax. delay: 1.508 sec  
 Pulse P. B deq: 90  
 Acq. time: 8.810 sec  
 Width: 180.0 Hz  
 256 repetitions  
 CHANNEL: P31, 181.4247484 MHz  
 DECUPLE: H1, 598.7601832 MHz  
 Power: 28 dB  
 Continuously on  
 WALTZ-16 modulated  
 DATA PROCESSING  
 Line broadening: 1.0 Hz  
 FT size: 282364  
 Total time: 1 hr, 16 min, 57 sec

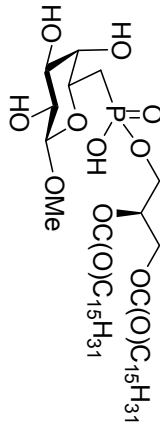

2

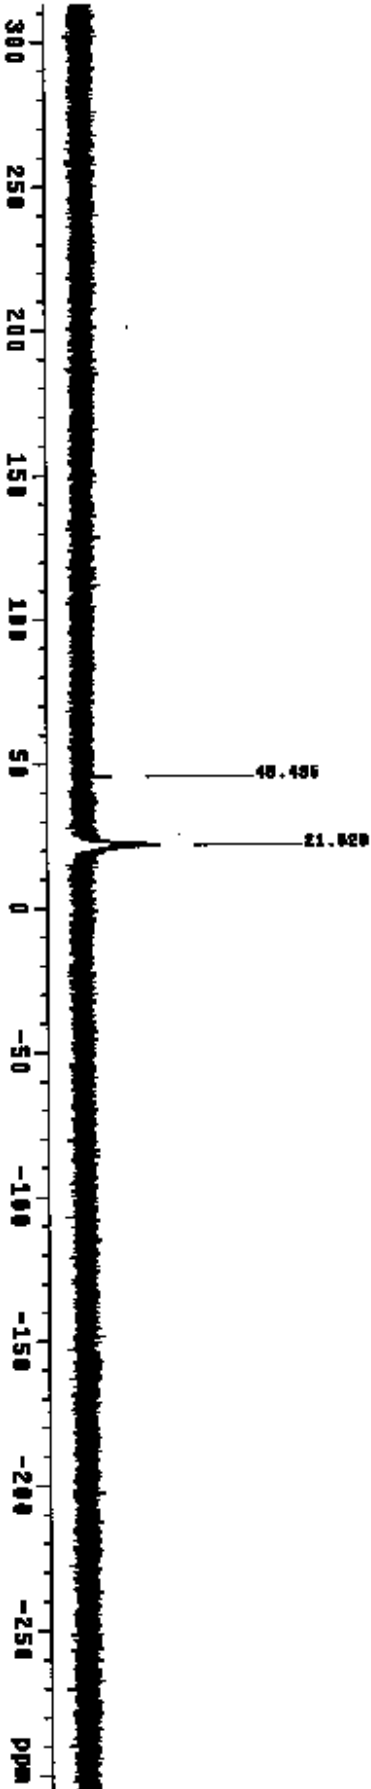

# SJW-2006-03-16-05 (CG-01) full MS (M+Na)<sup>+</sup>

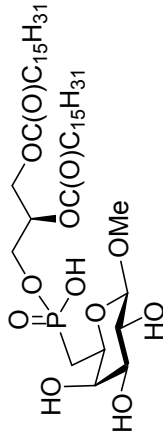

2

C:\Xcalibur\...SJW-2006-03-16-05\_CG-01

3/16/2006 3:25:18 PM

Carlie Gammon (CG-01) 0.01mg/mL

SJW-2006-03-16-05\_CG-01 # 1:30 RT: 0.00-0.71 AV:30 NL: 1.54E7

T: FTMS + p ESI Full ms [190.00-800.00]

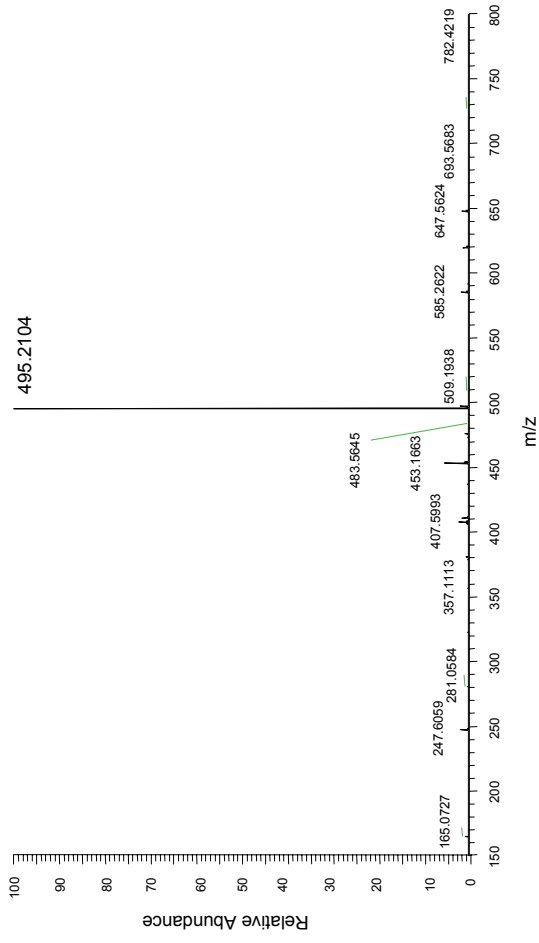

C:\Xcalibur\...SJW-2006-03-16-06\_CG-01

3/16/2006 3:26:27 PM

Carlie Gammon (CG-01) 0.01mg/mL

FTMS [M+Na]<sup>+</sup>

SJW-2006-03-16-06\_CG-01 #1:30 RT: 0.00-0.57 AV:30 NL: 1.20E7

T: FTMS + p ESI Full ms [493.00-500.00]

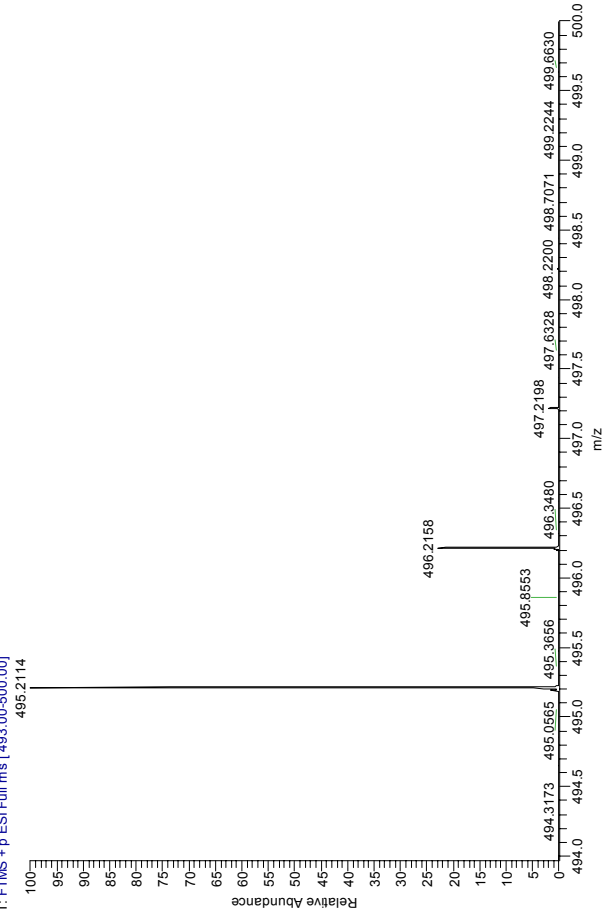

Experimental peaks

C23H37O8PNa: C23 H37 O8 P 1 Na 1 p(gss, s(p:8)) Chrg 1R: 84000 Res.Pwr. @FWHM

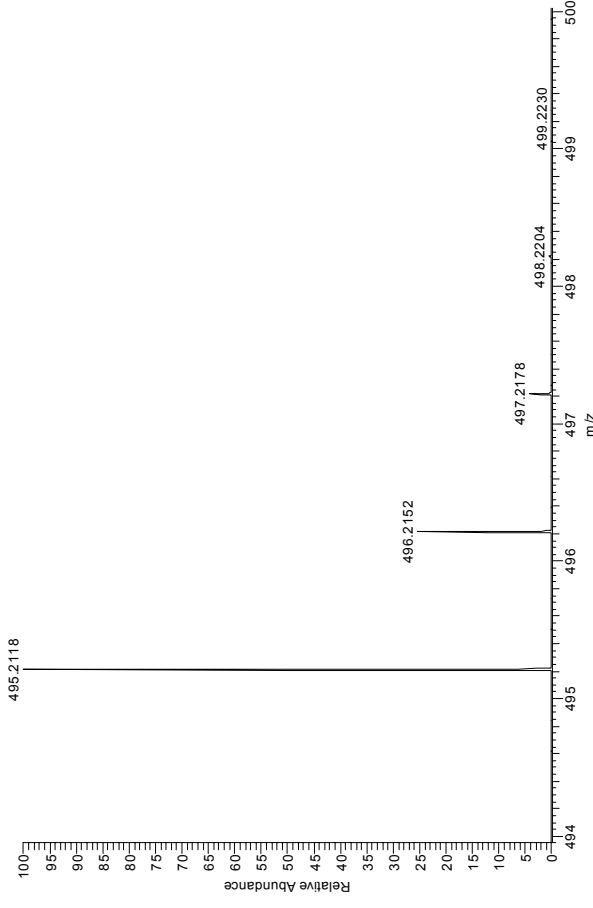

Theoretical peaks



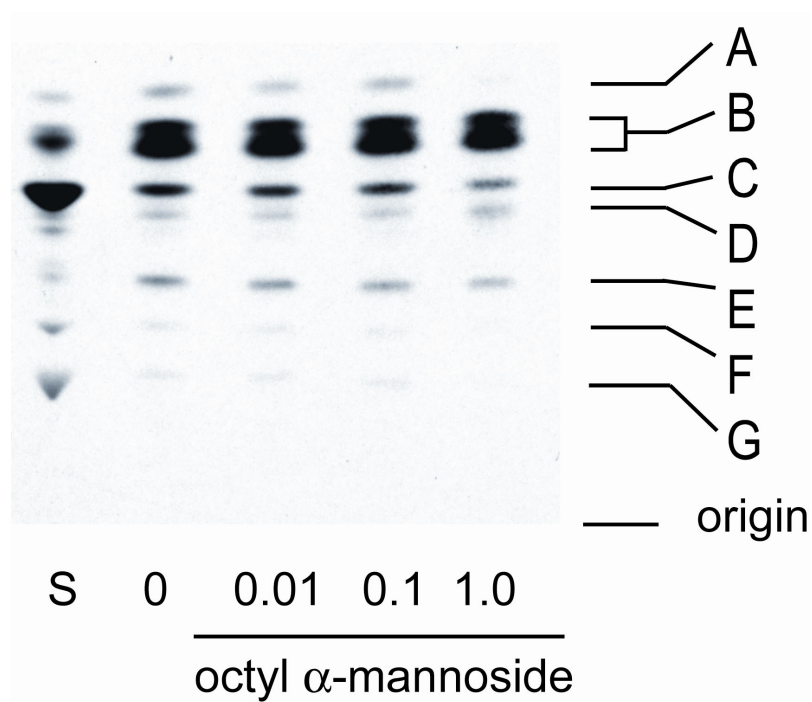

**Detergent control experiment: HPTLC analysis of octyl  $\alpha$ -D-mannoside.** *M. smegmatis* cell lysates were incubated with GDP- $^{3}\text{H}$ mannose in the absence (0) or presence of different concentrations of octyl  $\alpha$ -D-mannoside (concentrations in mM). S = authentic PIM standards derived from *in vivo*  $^{3}\text{H}$ mannose labelling; A = Ac<sub>2</sub>PIM1; B = PPM, Ac<sub>2</sub>PIM2, AcPIM1; C = AcPIM2; D = PIM1; E = PIM2; F = AcPIM5, AcPIM5'; G = AcPIM6. The abbreviations used are: Ac<sub>x</sub>PIM<sub>y</sub>, PIM species with *x* (1 or 2) fatty acyl chains, linked to either the core  $\alpha$ -1,2-linked Man or the *myo*-inositol head group, and *y* Man residues; PPM, polyprenol (C<sub>35</sub>/C<sub>50</sub>) phosphomannose.
